# Supplementary material for: Trisomy 21 increases microtubules and disrupts centriolar satellite localization
Source: PubMed Central journal article supplement — Mol Biol Cell. 2022 Jun 13;33(8):br11. doi: 10.1091/mbc.E21-10-0517-T (PMC9635274; doi:10.1091/mbc.e21-10-0517-t), 2022-06-13
Supplement: mbc-33-br11-s001.pdf [file mbc-33-br11-s001.pdf]

# Supplementary Materials

Molecular Biology of the Cell

McCurdy *et al.*

## Supplemental Figure Legends

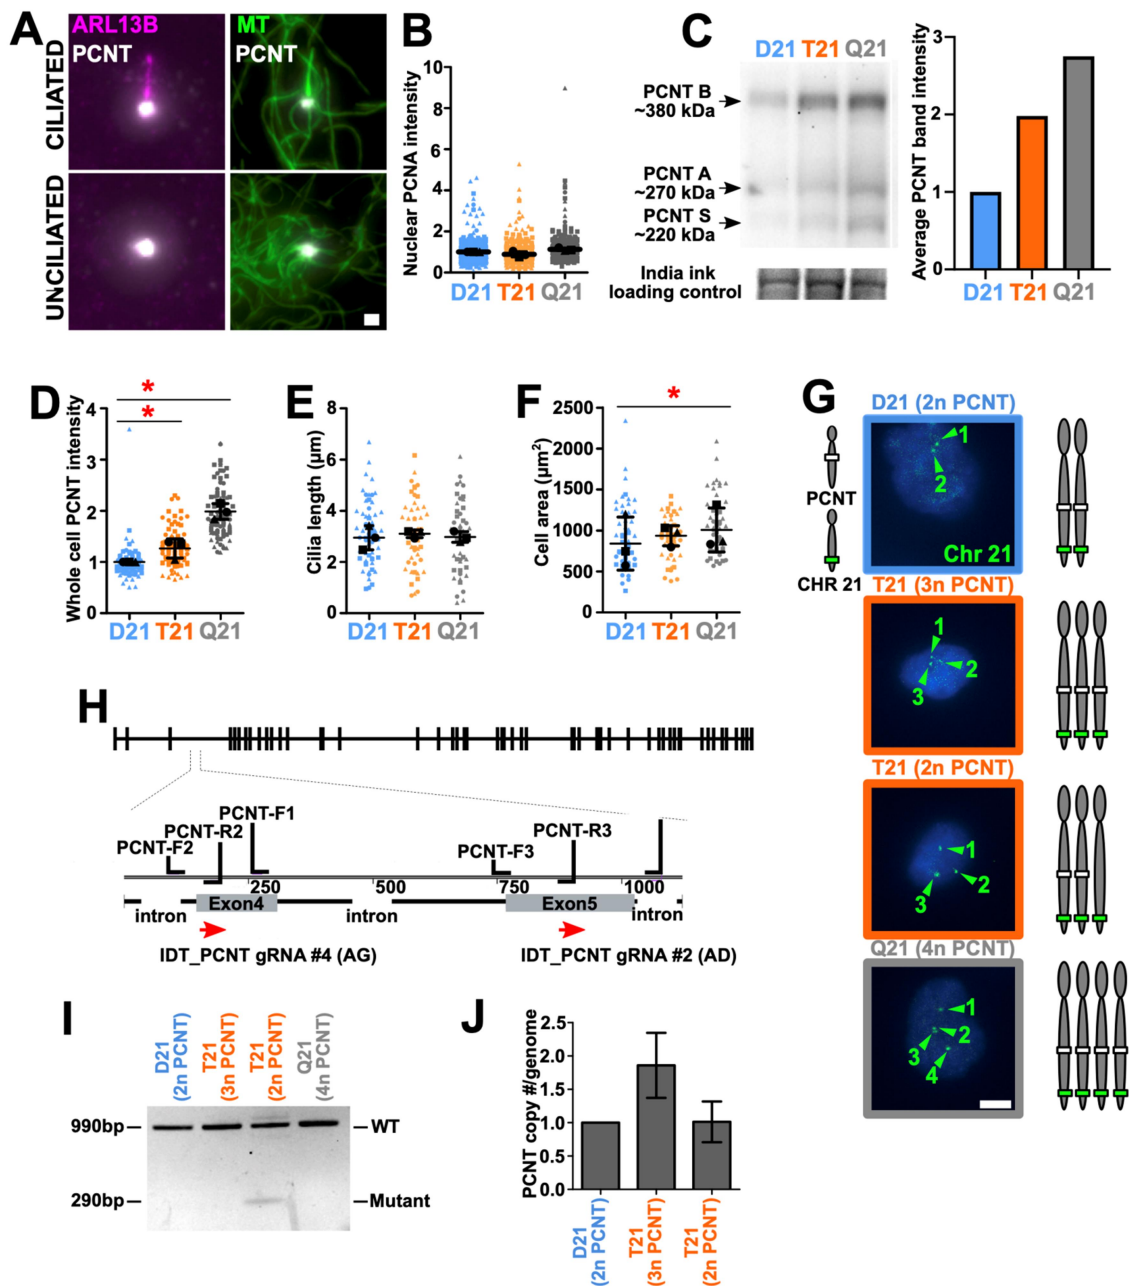

**Figure S1:** (A) Left, representative ciliated and unciliated D21 cell stained for centrosomes (PCNT; grayscale) and cilia (ARL13B; magenta). Right, representative ciliated and unciliated cell stained for centrosomes (PCNT; grayscale) and cilia (DM1A; MT; green). Scale bar, 1  $\mu\text{m}$ . (B) Nuclear PCNA intensity does not change among D21, T21, and Q21 RPE-1 cells. Mean  $\pm$  SD. \* $p < 0.05$  (Table 1). (C) PCNT isoform summed average band intensities for D21, T21, and Q21 RPE-1 cells. Band intensities normalized to india ink loading control band intensities. (D) Whole cell PCNT is increased in T21 and Q21 RPE-1 cells. Intensities normalized to D21 averages. Mean  $\pm$  SD. \* $p < 0.05$  (Table 1). (E) Cilia

length is unchanged between D21, T21, and Q21 RPE-1 cells. Mean±SD. (Table 1). **(F)** Cell area increases in Q21 RPE-1 cells. Mean±SD. \*p < 0.05 (Table 1). **(G)** CRISPR-Cas9 knockout of one allele of PCNT in T21 RPE-1 cells (T21 (2n PCNT)) does not alter chromosome 21 copy number (HSA21 subtelomere probe; green). Scale bar, 5 μm. **(H)** Cas9 cleavage sites are located in PCNT Exon 4 and Exon 5. PCR using PCNT-F2/R1 oligos was used to verify deletion of the gene segment spanning the two Cas9 cleavage sites. **(I)** PCR verification of genetic ablation of a single PCNT allele in T21 cells using PCNT-F2/R1 oligos. WT PCNT expected band size: 990 bp. Edited PCNT expected band size: 290 bp..**(J)** QIAGEN dPCR verification of PCNT copy number / genome.

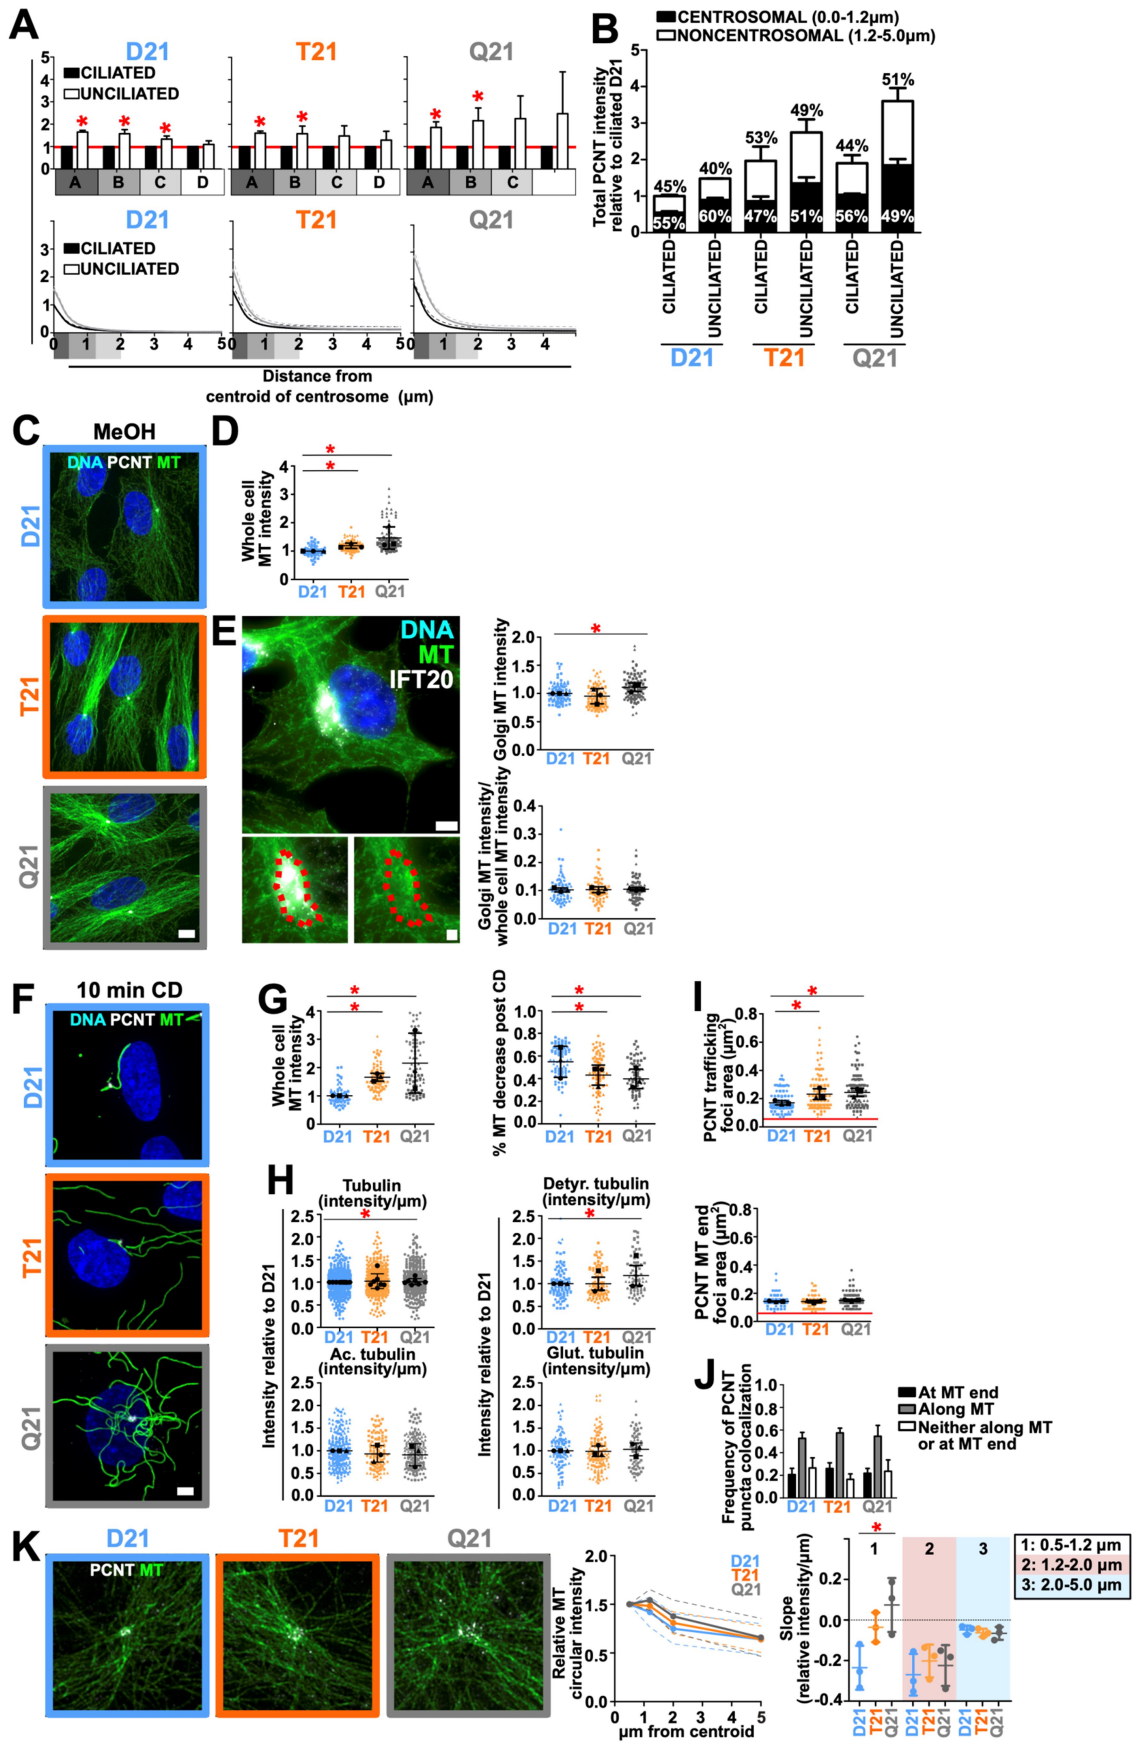

**Figure S2: (A)** Top, D21, T21, and Q21 regional binned PCNT fluorescence intensities. Intensity values normalized to ciliated cell average within each ploidy level (indicated with red line). Statistical comparisons made to ciliated averages. Bottom, D21, T21, and Q21 radial PCNT fluorescence intensities in ciliated and unciliated cells. Intensity normalized to ciliated D21 centrosome intensity. Solid lines denote mean and dashed lines denote SD. Mean±SD. \*p < 0.05 (Table 1). **(B)** PCNT fluorescence in a 5.0 µm radius around the centrosome in ciliated and unciliated D21, T21, and Q21 cells. Relative fractional intensity contributions of centrosomal and non centrosomal PCNT to the total PCNT intensity. Intensity was defined as centrosomal if the fluorescence intensity fell within 0.0 - 1.2 µm of the centriole of the centrosome. Intensity was defined as noncentrosomal if fluorescence intensity fell within 1.2 – 5.0 µm of the centrosome. Mean±SD. **(C)** D21, T21 and Q21 RPE-1 cells stained for MTs (DM1A; green), PCNT (PCNT; grayscale), and DNA (Hoescht 33258; blue). Cells in these images were methanol fixed. Scale bar, 4 µm. **(D)** D21, T21, and Q21 whole cell methanol fixed MT fluorescence intensities. Intensity values normalized to D21 average. Statistical comparisons made to D21 averages. Mean±SD. \*p < 0.05 (Table 1). **(E)** RPE-1 cell labeled for golgi apparatus (GA) (IFT20; grayscale), MTs (DM1A; green), and DNA (Hoescht 33258; blue). For GA MT quantification, GA boundaries were outlined (dashed red line) and MT intensities within outline were calculated. Top, GA MT intensity is significantly increased in Q21 RPE-1 cells. Bottom, GA MT contributions to whole cell MT intensities are unchanged in D21, T21, and Q21 cells. Intensity values normalized to D21 average. Statistical comparisons are made to D21 averages. Mean±SD. \*p < 0.05 (Table 1). **(F)** 10-minute CD D21, T21 and Q21 RPE-1 cells stained for MTs (DM1A; green), PCNT (PCNT; grayscale), and DNA (Hoescht 33258; blue). Samples were prepared with pre-permeabilization. **(G)** Left, D21, T21, and Q21 10-minute CD whole cell MT fluorescence intensities. Right, whole cell MT intensity reduction post 10-minute CD is reduced in T21 and Q21 RPE-1 cells. Statistical comparisons are made to D21 averages. Samples were prepared with pre-permeabilization. Mean±SD. \*p < 0.05 (Table 1). **(H)** D21, T21, Q21 intensity / µm values for tubulin and tubulin post-translational modifications. Mean±SD. \*p < 0.05 (Table 1). Tubulin, acetylated tubulin, glutamylated tubulin, and detyrosinated tubulin intensities were quantified. Intensity values are normalized to D21 average. Statistical comparisons are made to D21 averages. Samples were prepared with pre-permeabilization. Mean±SD. \*p < 0.05 (Table 1). **(I)** Top, PCNT puncta size along MTs is larger than 0.05 µm<sup>2</sup> (indicated with red line) and increases with HSA21 ploidy. Bottom, area of PCNT foci at MT minus ends are larger than 0.05 µm<sup>2</sup> (indicated with red line). Mean±SD. \*p < 0.05 (Table 1). **(J)** 78% of PCNT puncta, on average, localize to pre-permeabilized MTs in D21, T21, and Q21 RPE-1 cells. **(K)** Localization of PCNT (grayscale) and MTs (green) using SIM microscopy. Left, radial analysis quantification was performed to map the distribution of relative MT fluorescence intensity at 0.5, 1.2, 2.0, and 5.0 mm

from the centroid of the PCNT marked centrosome. Dashed lines denote standard deviation. Right, slopes of relative MT circular intensities denoted in S2K (left). Mean $\pm$ SD. \* $p < 0.05$  (Table 1).

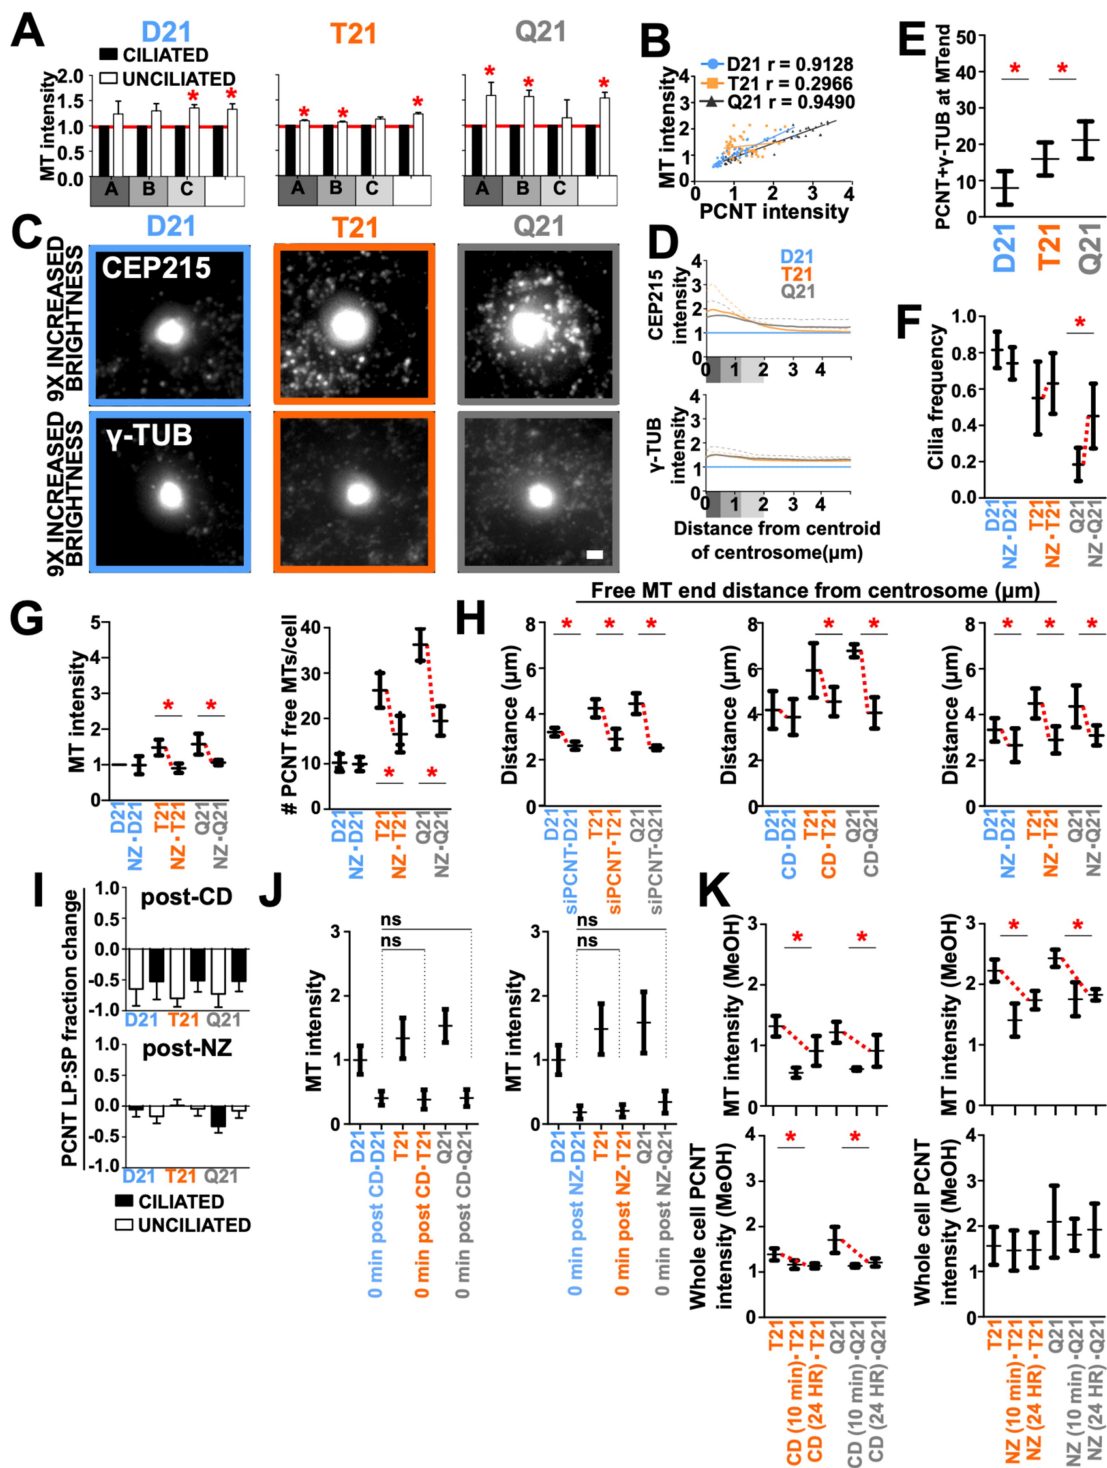

**Figure S3: (A)** D21, T21, and Q21 regional binned MT fluorescence intensities. Intensity values normalized to ciliated cell average within each ploidy level (indicated with red line). Statistical

comparisons made to ciliated averages. Mean±SD. \*p < 0.05. **(B)** MT and PCNT intensity correlation in D21, T21, and Q21 RPE-1 cells. D21 r = 0.9128, T21 r = 0.2966, Q21 r = 0.9490 (Table 1). **(C)** PCNT interacting partners, CEP215 and  $\gamma$ -tubulin, increase with HSA21 ploidy. Top panels, D21, T21, and Q21 cells stained for CEP215 (CEP215; grayscale). Bottom panels, D21, T21, and Q21 cells stained for  $\gamma$ -tubulin (GTU88; grayscale). Image brightness was increased 9-fold to highlight pericentrosomal and cytoplasmic regions. This saturates the centrosome signal. Scale bar, 1 $\mu$ m. **(D)** Top, T21 and Q21 radial CEP215 fluorescence intensities normalized to D21 intensity (indicated with blue line). Bottom, T21 and Q21 radial  $\gamma$ -tubulin fluorescence intensities normalized to D21 intensity (indicated with blue line). Solid lines denote mean and dashed lines denote SD. **(E)** PCNT and  $\gamma$ -tubulin colocalization at MT ends increases with HSA21 ploidy. Mean±SD. \*p < 0.05 (Table 1). **(F)** Nocodazole (NZ) treatment increases cilia frequencies in Q21 RPE-1 cells. Mean±SD. \*p < 0.05 (Table 1). **(G)** Left, NZ treatment reduces MT intensities in T21 and Q21 RPE-1 cells. Intensity values are normalized to D21 average. Data points represent 5.0  $\mu$ m binned radial MT fluorescence intensities. Right, NZ treatment reduces PCNT-associated MTs in T21 and Q21 RPE-1 cells. Mean±SD. \*p < 0.05 (Table 1). **(H)** Left, reducing PCNT via siRNA reduces distance of PCNT-associated free MTs from centrosome in D21, T21, and Q21 RPE-1 cells. Middle, CD treatment reduces distance of PCNT-associated free MTs from centrosome in D21, T21, and Q21 RPE-1 cells. Right, NZ treatment reduces distance of PCNT-associated free MTs from centrosome in D21, T21, and Q21 RPE-1 cells. Mean±SD. \*p < 0.05 (Table 1). **(I)** CD treatment reduces mean PCNT LP:SP ratios in T21 and Q21 RPE-1 cells while NZ treatment does not. Mean±SD. **(J)** Left, 60-80% of whole cell MTs in D21, T21, and Q21 RPE-1 cells are depolymerized 0 minutes post 20-minute CD treatment. Right, 75-85% of whole cell MTs in D21, T21, and Q21 RPE-1 cells are depolymerized 0 minutes post NZ treatment. Mean±SD. \*p < 0.05 (Table 1). **(K)** Top graphs, methanol fixed whole cell MT intensities 10 minutes after CD or NZ treatment. Bottom graphs, whole cell PCNT is reduced 10 minutes following CD and remains reduced 24 hours post CD. Whole cell PCNT is unchanged post NZ treatment. Intensity values normalized to D21 averages. Statistical comparisons made to D21 averages. Mean±SD. \*p < 0.05 (Table 1).



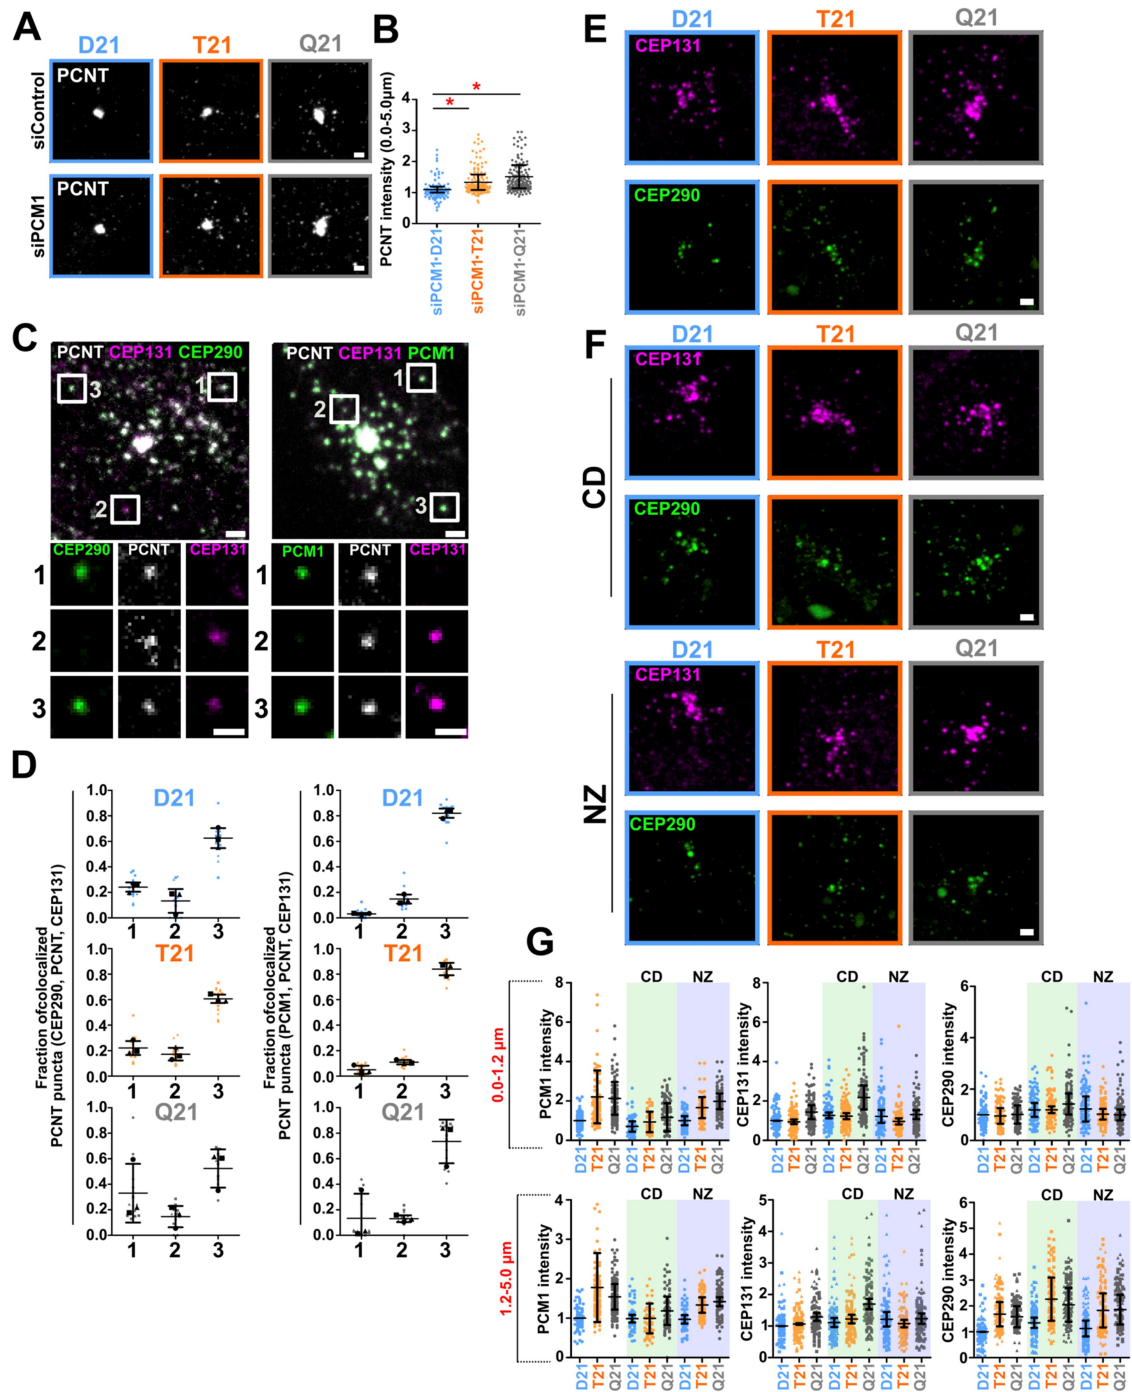

**Figure S4:** (A) siControl and siPCM1 treated D21, T21, and Q21 RPE-1 cells stained for PCNT (PCNT; grayscale). Scale bar, 1.5  $\mu$ m. (B) siPCM1 treatment does not affect PCNT elevation in T21 and Q21 RPE-1 cells. PCNT intensity normalized to siControl D21 RPE-1 cells. Mean $\pm$ SD. \* $p$  < 0.05 (Table 1). (C) Left, RPE-1 cell stained for PCNT (PCNT; grayscale), CEP131 (CEP131; magenta), and CEP290 (CEP290; green). Right, RPE-1 cell stained for PCNT (PCNT; grayscale), CEP131 (CEP131; magenta), and PCM1



(PCM1; green). Insets show examples of colocalization quantified in (D). Scale bars, 1.5  $\mu\text{m}$  and 1  $\mu\text{m}$  for insets. **(D)** Colocalization of PCNT puncta with CEP290, PCM1, and CEP131 in D21, T21, and Q21 RPE-1 cells as defined in (C). Mean $\pm$ SD. **(E)** D21, T21, and Q21 RPE-1 cells stained for CEP131 (CEP131; magenta) and CEP290 (CEP290; green). Scale bars, 1.5  $\mu\text{m}$ . **(F)** Top, D21, T21, and Q21 RPE-1 cells stained for CEP131 (CEP131; magenta) and CEP290 (CEP290; green) 24 hours post-CD treatment. Bottom, D21, T21, and Q21 RPE-1 cells stained for CEP131 (CEP131; magenta) and CEP290 (CEP290; green) 24 hours post-NZ treatment. Scale bar, 1.5  $\mu\text{m}$ . **(G)** Top, binned (0.0-1.2  $\mu\text{m}$  radius around the centrosome) PCM1, CEP131, and CEP290 fluorescence intensity in control, cold-treated, and nocodazole treated D21, T21, and Q21 RPE-1 cells. Intensity normalized to D21 control intensity. Bottom, binned (1.2-5.0  $\mu\text{m}$  radius around the centrosome) PCM1, CEP131, and CEP290 fluorescence intensity in control, cold-treated, and nocodazole treated D21, T21, and Q21 RPE-1 cells. Intensity normalized to D21 control intensity. Mean $\pm$ SD. \* $p < 0.05$  (Table 1).

**NORMALITY TESTS AND SAMPLE SIZE****Figure 1: B**

| Sample | n | Biological replicates | Normality Test | Normally Distributed? |
|--------|---|-----------------------|----------------|-----------------------|
| D21    |   | 200                   | 4 NA           | NA                    |
| T21    |   | 200                   | 4 NA           | NA                    |
| Q21    |   | 200                   | 4 NA           | NA                    |

**Figure 1: D**

| Sample           | n | Biological replicates | Normality Test                                | Normally Distributed? |
|------------------|---|-----------------------|-----------------------------------------------|-----------------------|
| D21 (ciliated)   |   | 161                   | 3 D'Agostino & Pearson omnibus normality test | No                    |
| D21 (unciliated) |   | 83                    | 3 D'Agostino & Pearson omnibus normality test | No                    |
| D21 (combined)   |   | 244                   | 3 D'Agostino & Pearson omnibus normality test | No                    |
| T21 (ciliated)   |   | 81                    | 3 D'Agostino & Pearson omnibus normality test | Yes                   |
| T21 (unciliated) |   | 165                   | 3 D'Agostino & Pearson omnibus normality test | Yes                   |
| T21 (combined)   |   | 246                   | 3 D'Agostino & Pearson omnibus normality test | Yes                   |
| Q21 (ciliated)   |   | 72                    | 3 D'Agostino & Pearson omnibus normality test | Yes                   |
| Q21 (unciliated) |   | 257                   | 3 D'Agostino & Pearson omnibus normality test | Yes                   |
| Q21 (combined)   |   | 329                   | 3 D'Agostino & Pearson omnibus normality test | No                    |

**Figure 1: E (LEFT GRAPH)**

| Sample        | n | Biological replicates | Normality Test                                | Normally Distributed? |
|---------------|---|-----------------------|-----------------------------------------------|-----------------------|
| D21           |   | 90                    | 3 D'Agostino & Pearson omnibus normality test | No                    |
| D21 (siPCNT)  |   | 90                    | 3 D'Agostino & Pearson omnibus normality test | No                    |
| T21           |   | 90                    | 3 D'Agostino & Pearson omnibus normality test | No                    |
| T21 (siPCNT)  |   | 90                    | 3 D'Agostino & Pearson omnibus normality test | No                    |
| Q21           |   | 90                    | 3 D'Agostino & Pearson omnibus normality test | No                    |
| Q21 (siPCNT)  |   | 90                    | 3 D'Agostino & Pearson omnibus normality test | No                    |
| T21 (3n PCNT) |   | 90                    | 3 D'Agostino & Pearson omnibus normality test | No                    |
| T21 (2n PCNT) |   | 90                    | 3 D'Agostino & Pearson omnibus normality test | No                    |

**Figure 1: E (RIGHT GRAPH)**

| Sample        | n | Biological replicates | Normality Test | Normally Distributed? |
|---------------|---|-----------------------|----------------|-----------------------|
| D21           |   | 90                    | 3 NA           | NA                    |
| D21 (siPCNT)  |   | 90                    | 3 NA           | NA                    |
| T21           |   | 90                    | 3 NA           | NA                    |
| T21 (siPCNT)  |   | 90                    | 3 NA           | NA                    |
| Q21           |   | 90                    | 3 NA           | NA                    |
| Q21 (siPCNT)  |   | 90                    | 3 NA           | NA                    |
| T21 (3n PCNT) |   | 90                    | 3 NA           | NA                    |
| T21 (2n PCNT) |   | 90                    | 3 NA           | NA                    |

**Figure S1: B**

| Sample | n | Biological replicates | Normality Test                                | Normally Distributed? |
|--------|---|-----------------------|-----------------------------------------------|-----------------------|
| D21    |   | 488                   | 3 D'Agostino & Pearson omnibus normality test | No                    |
| T21    |   | 562                   | 3 D'Agostino & Pearson omnibus normality test | No                    |
| Q21    |   | 545                   | 3 D'Agostino & Pearson omnibus normality test | No                    |

**Figure S1: D**

| Sample | n | Biological replicates | Normality Test                                | Normally Distributed? |
|--------|---|-----------------------|-----------------------------------------------|-----------------------|
| D21    |   | 92                    | 3 D'Agostino & Pearson omnibus normality test | No                    |
| T21    |   | 96                    | 3 D'Agostino & Pearson omnibus normality test | No                    |
| Q21    |   | 96                    | 3 D'Agostino & Pearson omnibus normality test | No                    |

**Figure S1: C**

| Sample | n | Biological replicates | Normality Test                                | Normally Distributed? |
|--------|---|-----------------------|-----------------------------------------------|-----------------------|
| D21    |   | 64                    | 3 D'Agostino & Pearson omnibus normality test | Yes                   |
| T21    |   | 52                    | 3 D'Agostino & Pearson omnibus normality test | Yes                   |
| Q21    |   | 47                    | 3 D'Agostino & Pearson omnibus normality test | Yes                   |

**Figure S1: D**

| Sample | n | Biological replicates | Normality Test                                | Normally Distributed? |
|--------|---|-----------------------|-----------------------------------------------|-----------------------|
| D21    |   | 50                    | 3 D'Agostino & Pearson omnibus normality test | No                    |
| T21    |   | 50                    | 3 D'Agostino & Pearson omnibus normality test | Yes                   |
| Q21    |   | 50                    | 3 D'Agostino & Pearson omnibus normality test | Yes                   |

**Figure 2: C**

| Sample           | n | Biological replicates | Normality Test                                | Normally Distributed? |
|------------------|---|-----------------------|-----------------------------------------------|-----------------------|
| D21 (ciliated)   |   | 90                    | 3 D'Agostino & Pearson omnibus normality test | No                    |
| D21 (unciliated) |   | 90                    | 3 D'Agostino & Pearson omnibus normality test | No                    |
| T21 (ciliated)   |   | 90                    | 3 D'Agostino & Pearson omnibus normality test | Yes                   |
| T21 (unciliated) |   | 90                    | 3 D'Agostino & Pearson omnibus normality test | Yes                   |
| Q21 (ciliated)   |   | 90                    | 3 D'Agostino & Pearson omnibus normality test | No                    |
| Q21 (unciliated) |   | 90                    | 3 D'Agostino & Pearson omnibus normality test | Yes                   |

**Figure 2: D**

| Sample           | n | Biological replicates | Normality Test                                | Normally Distributed? |
|------------------|---|-----------------------|-----------------------------------------------|-----------------------|
| D21 (ciliated)   |   | 90                    | 3 D'Agostino & Pearson omnibus normality test | No                    |
| D21 (unciliated) |   | 90                    | 3 D'Agostino & Pearson omnibus normality test | Yes                   |
| T21 (ciliated)   |   | 90                    | 3 D'Agostino & Pearson omnibus normality test | No                    |
| T21 (unciliated) |   | 90                    | 3 D'Agostino & Pearson omnibus normality test | No                    |

|                                   |    |                       |                                               |                       |
|-----------------------------------|----|-----------------------|-----------------------------------------------|-----------------------|
| Q21 (ciliated)                    | 90 |                       | 3 D'Agostino & Pearson omnibus normality test | Yes                   |
| Q21 (unciliated)                  | 90 |                       | 3 D'Agostino & Pearson omnibus normality test | No                    |
| <b>Figure 2: F</b>                |    |                       |                                               |                       |
| Sample                            | n  | Biological replicates | Normality Test                                | Normally Distributed? |
| T21 (2n PCNT) ciliated            |    | 90                    | 3 D'Agostino & Pearson omnibus normality test | No                    |
| T21 (2n PCNT) unciliated          |    | 90                    | 3 D'Agostino & Pearson omnibus normality test | No                    |
| T21 (siPCNT) ciliated             |    | 90                    | 3 D'Agostino & Pearson omnibus normality test | Yes                   |
| T21 (siPCNT) unciliated           |    | 90                    | 3 D'Agostino & Pearson omnibus normality test | No                    |
| Q21 (siPCNT) ciliated             |    | 90                    | 3 D'Agostino & Pearson omnibus normality test | Yes                   |
| Q21 (siPCNT) unciliated           |    | 90                    | 3 D'Agostino & Pearson omnibus normality test | No                    |
| <b>Figure 2: G (LEFT)</b>         |    |                       |                                               |                       |
| Sample                            | n  | Biological replicates | Normality Test                                | Normally Distributed? |
| D21                               |    | 38                    | 3 D'Agostino & Pearson omnibus normality test | Yes                   |
| T21                               |    | 44                    | 3 D'Agostino & Pearson omnibus normality test | Yes                   |
| Q21                               |    | 54                    | 3 D'Agostino & Pearson omnibus normality test | Yes                   |
| <b>Figure 2: G (RIGHT)</b>        |    |                       |                                               |                       |
| Sample                            | n  | Biological replicates | Normality Test                                | Normally Distributed? |
| D21                               |    | 134                   | 3 D'Agostino & Pearson omnibus normality test | Yes                   |
| T21                               |    | 117                   | 3 D'Agostino & Pearson omnibus normality test | No                    |
| Q21                               |    | 132                   | 3 D'Agostino & Pearson omnibus normality test | No                    |
| <b>Figure S2: A (TOP)</b>         |    |                       |                                               |                       |
| Sample                            | n  | Biological replicates | Normality Test                                | Normally Distributed? |
| D21 (ciliated)                    |    | 90                    | 3 D'Agostino & Pearson omnibus normality test | No                    |
| D21 (unciliated)                  |    | 90                    | 3 D'Agostino & Pearson omnibus normality test | No                    |
| T21 (ciliated)                    |    | 90                    | 3 D'Agostino & Pearson omnibus normality test | Yes                   |
| T21 (unciliated)                  |    | 90                    | 3 D'Agostino & Pearson omnibus normality test | Yes                   |
| Q21 (ciliated)                    |    | 90                    | 3 D'Agostino & Pearson omnibus normality test | No                    |
| Q21 (unciliated)                  |    | 90                    | 3 D'Agostino & Pearson omnibus normality test | Yes                   |
| <b>Figure S2: B</b>               |    |                       |                                               |                       |
| Sample                            | n  | Biological replicates | Normality Test                                | Normally Distributed? |
| D21 (ciliated)                    |    | 90                    | 3 D'Agostino & Pearson omnibus normality test | No                    |
| D21 (unciliated)                  |    | 90                    | 3 D'Agostino & Pearson omnibus normality test | No                    |
| T21 (ciliated)                    |    | 90                    | 3 D'Agostino & Pearson omnibus normality test | Yes                   |
| T21 (unciliated)                  |    | 90                    | 3 D'Agostino & Pearson omnibus normality test | Yes                   |
| Q21 (ciliated)                    |    | 90                    | 3 D'Agostino & Pearson omnibus normality test | No                    |
| Q21 (unciliated)                  |    | 90                    | 3 D'Agostino & Pearson omnibus normality test | Yes                   |
| <b>Figure S2: D</b>               |    |                       |                                               |                       |
| Sample                            | n  | Biological replicates | Normality Test                                | Normally Distributed? |
| D21                               |    | 95                    | 3 D'Agostino & Pearson omnibus normality test | Yes                   |
| T21                               |    | 106                   | 3 D'Agostino & Pearson omnibus normality test | No                    |
| Q21                               |    | 100                   | 3 D'Agostino & Pearson omnibus normality test | No                    |
| <b>Figure S2: E (TOP)</b>         |    |                       |                                               |                       |
| Sample                            | n  | Biological replicates | Normality Test                                | Normally Distributed? |
| D21                               |    | 126                   | 3 D'Agostino & Pearson omnibus normality test | No                    |
| T21                               |    | 111                   | 3 D'Agostino & Pearson omnibus normality test | No                    |
| Q21                               |    | 122                   | 3 D'Agostino & Pearson omnibus normality test | No                    |
| <b>Figure S2: E (BOTTOM)</b>      |    |                       |                                               |                       |
| Sample                            | n  | Biological replicates | Normality Test                                | Normally Distributed? |
| D21                               |    | 90                    | 3 D'Agostino & Pearson omnibus normality test | No                    |
| T21                               |    | 81                    | 3 D'Agostino & Pearson omnibus normality test | No                    |
| Q21                               |    | 82                    | 3 D'Agostino & Pearson omnibus normality test | No                    |
| <b>Figure S2: G (LEFT)</b>        |    |                       |                                               |                       |
| Sample                            | n  | Biological replicates | Normality Test                                | Normally Distributed? |
| D21                               |    | 93                    | 3 D'Agostino & Pearson omnibus normality test | No                    |
| T21                               |    | 96                    | 3 D'Agostino & Pearson omnibus normality test | No                    |
| Q21                               |    | 97                    | 3 D'Agostino & Pearson omnibus normality test | No                    |
| <b>Figure S2: G (RIGHT)</b>       |    |                       |                                               |                       |
| Sample                            | n  | Biological replicates | Normality Test                                | Normally Distributed? |
| D21                               |    | 93                    | 3 D'Agostino & Pearson omnibus normality test | No                    |
| T21                               |    | 96                    | 3 D'Agostino & Pearson omnibus normality test | No                    |
| Q21                               |    | 97                    | 3 D'Agostino & Pearson omnibus normality test | No                    |
| <b>Figure S2: H (TUBULIN)</b>     |    |                       |                                               |                       |
| Sample                            | n  | Biological replicates | Normality Test                                | Normally Distributed? |
| D21                               |    | 722                   | 7 D'Agostino & Pearson omnibus normality test | No                    |
| T21                               |    | 542                   | 7 D'Agostino & Pearson omnibus normality test | No                    |
| Q21                               |    | 602                   | 7 D'Agostino & Pearson omnibus normality test | No                    |
| <b>Figure S2: H (AC. TUBULIN)</b> |    |                       |                                               |                       |
| Sample                            | n  | Biological replicates | Normality Test                                | Normally Distributed? |

|                                      |   |                       |                                               |                       |
|--------------------------------------|---|-----------------------|-----------------------------------------------|-----------------------|
| D21                                  |   | 270                   | 3 D'Agostino & Pearson omnibus normality test | No                    |
| T21                                  |   | 133                   | 3 D'Agostino & Pearson omnibus normality test | No                    |
| Q21                                  |   | 221                   | 3 D'Agostino & Pearson omnibus normality test | No                    |
| <b>Figure S2: H (GLUT. TUBULIN)</b>  |   |                       |                                               |                       |
| Sample                               | n | Biological replicates | Normality Test                                | Normally Distributed? |
| D21                                  |   | 113                   | 3 D'Agostino & Pearson omnibus normality test | Yes                   |
| T21                                  |   | 160                   | 3 D'Agostino & Pearson omnibus normality test | No                    |
| Q21                                  |   | 83                    | 3 D'Agostino & Pearson omnibus normality test | No                    |
| <b>Figure S2: H (DETYR. TUBULIN)</b> |   |                       |                                               |                       |
| Sample                               | n | Biological replicates | Normality Test                                | Normally Distributed? |
| D21                                  |   | 135                   | 3 D'Agostino & Pearson omnibus normality test | No                    |
| T21                                  |   | 129                   | 3 D'Agostino & Pearson omnibus normality test | No                    |
| Q21                                  |   | 88                    | 3 D'Agostino & Pearson omnibus normality test | No                    |
| <b>Figure S2: I (TOP)</b>            |   |                       |                                               |                       |
| Sample                               | n | Biological replicates | Normality Test                                | Normally Distributed? |
| D21                                  |   | 113                   | 3 D'Agostino & Pearson omnibus normality test | No                    |
| T21                                  |   | 148                   | 3 D'Agostino & Pearson omnibus normality test | No                    |
| Q21                                  |   | 147                   | 3 D'Agostino & Pearson omnibus normality test | No                    |
| <b>Figure S2: I (BOTTOM)</b>         |   |                       |                                               |                       |
| Sample                               | n | Biological replicates | Normality Test                                | Normally Distributed? |
| D21                                  |   | 151                   | 3 D'Agostino & Pearson omnibus normality test | No                    |
| T21                                  |   | 150                   | 3 D'Agostino & Pearson omnibus normality test | No                    |
| Q21                                  |   | 150                   | 3 D'Agostino & Pearson omnibus normality test | No                    |
| <b>Figure S2: J</b>                  |   |                       |                                               |                       |
| Sample                               | n | Biological replicates | Normality Test                                | Normally Distributed? |
| D21 (MT END)                         |   | 15                    | 3 NA                                          | NA                    |
| T21 (MT END)                         |   | 15                    | 3 NA                                          | NA                    |
| Q21 (MT END)                         |   | 15                    | 3 NA                                          | NA                    |
| D21 (ALONG MT)                       |   | 15                    | 3 NA                                          | NA                    |
| T21 (ALONG MT)                       |   | 15                    | 3 NA                                          | NA                    |
| Q21 (ALONG MT)                       |   | 15                    | 3 NA                                          | NA                    |
| D21 (NEITHER)                        |   | 15                    | 3 NA                                          | NA                    |
| T21 (NEITHER)                        |   | 15                    | 3 NA                                          | NA                    |
| Q21 (NEITHER)                        |   | 15                    | 3 NA                                          | NA                    |
| <b>Figure S2:K</b>                   |   |                       |                                               |                       |
| Sample                               | n | Biological replicates | Normality Test                                | Normally Distributed? |
| D21                                  |   | 16                    | 3 D'Agostino & Pearson omnibus normality test | No                    |
| T21                                  |   | 16                    | 3 D'Agostino & Pearson omnibus normality test | No                    |
| Q21                                  |   | 16                    | 3 D'Agostino & Pearson omnibus normality test | No                    |
| <b>Figure 3: B</b>                   |   |                       |                                               |                       |
| Sample                               | n | Biological replicates | Normality Test                                | Normally Distributed? |
| D21 (ciliated)                       |   | 90                    | 3 D'Agostino & Pearson omnibus normality test | No                    |
| D21 (unciliated)                     |   | 90                    | 3 D'Agostino & Pearson omnibus normality test | No                    |
| T21 (ciliated)                       |   | 90                    | 3 D'Agostino & Pearson omnibus normality test | No                    |
| T21 (unciliated)                     |   | 90                    | 3 D'Agostino & Pearson omnibus normality test | No                    |
| Q21 (ciliated)                       |   | 90                    | 3 D'Agostino & Pearson omnibus normality test | No                    |
| Q21 (unciliated)                     |   | 90                    | 3 D'Agostino & Pearson omnibus normality test | No                    |
| <b>Figure 3:D (LEFT)</b>             |   |                       |                                               |                       |
| Sample                               | n | Biological replicates | Normality Test                                | Normally Distributed? |
| D21                                  |   | 90                    | 3 D'Agostino & Pearson omnibus normality test | No                    |
| T21                                  |   | 90                    | 3 D'Agostino & Pearson omnibus normality test | No                    |
| Q21                                  |   | 90                    | 3 D'Agostino & Pearson omnibus normality test | No                    |
| <b>Figure 3:D (RIGHT)</b>            |   |                       |                                               |                       |
| Sample                               | n | Biological replicates | Normality Test                                | Normally Distributed? |
| D21                                  |   | 90                    | 3 D'Agostino & Pearson omnibus normality test | Yes                   |
| T21                                  |   | 90                    | 3 D'Agostino & Pearson omnibus normality test | Yes                   |
| Q21                                  |   | 90                    | 3 D'Agostino & Pearson omnibus normality test | Yes                   |
| <b>Figure 3:F (LEFT)</b>             |   |                       |                                               |                       |
| Sample                               | n | Biological replicates | Normality Test                                | Normally Distributed? |
| D21                                  |   | 90                    | 3 D'Agostino & Pearson omnibus normality test | No                    |
| D21 (siPCNT)                         |   | 90                    | 3 D'Agostino & Pearson omnibus normality test | No                    |
| T21                                  |   | 90                    | 3 D'Agostino & Pearson omnibus normality test | Yes                   |
| T21 (siPCNT)                         |   | 90                    | 3 D'Agostino & Pearson omnibus normality test | Yes                   |
| Q21                                  |   | 90                    | 3 D'Agostino & Pearson omnibus normality test | No                    |
| Q21 (siPCNT)                         |   | 90                    | 3 D'Agostino & Pearson omnibus normality test | Yes                   |
| T21 (3n PCNT)                        |   | 90                    | 3 D'Agostino & Pearson omnibus normality test | Yes                   |
| T21 (2n PCNT)                        |   | 90                    | 3 D'Agostino & Pearson omnibus normality test | No                    |
| <b>Figure 3:F (RIGHT)</b>            |   |                       |                                               |                       |
| Sample                               | n | Biological replicates | Normality Test                                | Normally Distributed? |

|              |    |                                               |     |
|--------------|----|-----------------------------------------------|-----|
| D21          | 90 | 3 D'Agostino & Pearson omnibus normality test | No  |
| D21 (siPCNT) | 90 | 3 D'Agostino & Pearson omnibus normality test | Yes |
| T21          | 90 | 3 D'Agostino & Pearson omnibus normality test | Yes |
| T21 (siPCNT) | 90 | 3 D'Agostino & Pearson omnibus normality test | Yes |
| Q21          | 90 | 3 D'Agostino & Pearson omnibus normality test | Yes |
| Q21 (siPCNT) | 90 | 3 D'Agostino & Pearson omnibus normality test | Yes |

**Figure 3: I**

| Sample              | n | Biological replicates | Normality Test                                | Normally Distributed? |
|---------------------|---|-----------------------|-----------------------------------------------|-----------------------|
| D21 (CD) ciliated   |   | 90                    | 3 D'Agostino & Pearson omnibus normality test | No                    |
| D21 (CD) unciliated |   | 90                    | 3 D'Agostino & Pearson omnibus normality test | No                    |
| T21 (CD) ciliated   |   | 90                    | 3 D'Agostino & Pearson omnibus normality test | No                    |
| T21 (CD) unciliated |   | 90                    | 3 D'Agostino & Pearson omnibus normality test | No                    |
| Q21 (CD) ciliated   |   | 90                    | 3 D'Agostino & Pearson omnibus normality test | No                    |
| Q21 (CD) unciliated |   | 90                    | 3 D'Agostino & Pearson omnibus normality test | No                    |

**Figure 3: J**

| Sample   | n | Biological replicates | Normality Test | Normally Distributed? |
|----------|---|-----------------------|----------------|-----------------------|
| D21      |   | 211                   | 3 NA           | NA                    |
| D21 (CD) |   | 166                   | 3 NA           | NA                    |
| T21      |   | 187                   | 3 NA           | NA                    |
| T21 (CD) |   | 161                   | 3 NA           | NA                    |
| Q21      |   | 165                   | 3 NA           | NA                    |
| Q21 (CD) |   | 191                   | 3 NA           | NA                    |

**Figure 3: K (LEFT)**

| Sample   | n | Biological replicates | Normality Test                                | Normally Distributed? |
|----------|---|-----------------------|-----------------------------------------------|-----------------------|
| D21      |   | 90                    | 3 D'Agostino & Pearson omnibus normality test | No                    |
| D21 (CD) |   | 90                    | 3 D'Agostino & Pearson omnibus normality test | Yes                   |
| T21      |   | 90                    | 3 D'Agostino & Pearson omnibus normality test | No                    |
| T21 (CD) |   | 90                    | 3 D'Agostino & Pearson omnibus normality test | Yes                   |
| Q21      |   | 90                    | 3 D'Agostino & Pearson omnibus normality test | Yes                   |
| Q21 (CD) |   | 90                    | 3 D'Agostino & Pearson omnibus normality test | No                    |

**Figure 3: K (RIGHT)**

| Sample   | n | Biological replicates | Normality Test                                | Normally Distributed? |
|----------|---|-----------------------|-----------------------------------------------|-----------------------|
| D21      |   | 90                    | 3 D'Agostino & Pearson omnibus normality test | Yes                   |
| D21 (CD) |   | 90                    | 3 D'Agostino & Pearson omnibus normality test | No                    |
| T21      |   | 90                    | 3 D'Agostino & Pearson omnibus normality test | Yes                   |
| T21 (CD) |   | 90                    | 3 D'Agostino & Pearson omnibus normality test | Yes                   |
| Q21      |   | 90                    | 3 D'Agostino & Pearson omnibus normality test | Yes                   |
| Q21 (CD) |   | 90                    | 3 D'Agostino & Pearson omnibus normality test | Yes                   |

**Figure S3: A**

| Sample           | n | Biological replicates | Normality Test                                | Normally Distributed? |
|------------------|---|-----------------------|-----------------------------------------------|-----------------------|
| D21 (ciliated)   |   | 90                    | 3 D'Agostino & Pearson omnibus normality test | No                    |
| D21 (unciliated) |   | 90                    | 3 D'Agostino & Pearson omnibus normality test | No                    |
| T21 (ciliated)   |   | 90                    | 3 D'Agostino & Pearson omnibus normality test | No                    |
| T21 (unciliated) |   | 90                    | 3 D'Agostino & Pearson omnibus normality test | No                    |
| Q21 (ciliated)   |   | 90                    | 3 D'Agostino & Pearson omnibus normality test | No                    |
| Q21 (unciliated) |   | 90                    | 3 D'Agostino & Pearson omnibus normality test | No                    |

**Figure S3: B**

| Sample | n | Biological replicates | Normality Test                                | Normally Distributed? |
|--------|---|-----------------------|-----------------------------------------------|-----------------------|
| D21    |   | 46                    | 3 D'Agostino & Pearson omnibus normality test | Yes                   |
| T21    |   | 52                    | 3 D'Agostino & Pearson omnibus normality test | Yes                   |
| Q21    |   | 51                    | 3 D'Agostino & Pearson omnibus normality test | Yes                   |

**Figure S3: E**

| Sample | n | Biological replicates | Normality Test                                | Normally Distributed? |
|--------|---|-----------------------|-----------------------------------------------|-----------------------|
| D21    |   | 45                    | 3 D'Agostino & Pearson omnibus normality test | Yes                   |
| T21    |   | 45                    | 3 D'Agostino & Pearson omnibus normality test | Yes                   |
| Q21    |   | 45                    | 3 D'Agostino & Pearson omnibus normality test | Yes                   |

**Figure S3: F**

| Sample   | n | Biological replicates | Normality Test | Normally Distributed? |
|----------|---|-----------------------|----------------|-----------------------|
| D21      |   | 150                   | 4 NA           | NA                    |
| D21 (NZ) |   | 150                   | 4 NA           | NA                    |
| T21      |   | 150                   | 4 NA           | NA                    |
| T21 (NZ) |   | 150                   | 4 NA           | NA                    |
| Q21      |   | 150                   | 4 NA           | NA                    |
| Q21 (NZ) |   | 150                   | 4 NA           | NA                    |

**Figure S3: G (LEFT)**

| Sample   | n | Biological replicates | Normality Test                                | Normally Distributed? |
|----------|---|-----------------------|-----------------------------------------------|-----------------------|
| D21      |   | 90                    | 3 D'Agostino & Pearson omnibus normality test | No                    |
| D21 (NZ) |   | 90                    | 3 D'Agostino & Pearson omnibus normality test | Yes                   |
| T21      |   | 90                    | 3 D'Agostino & Pearson omnibus normality test | No                    |
| T21 (NZ) |   | 90                    | 3 D'Agostino & Pearson omnibus normality test | Yes                   |
| Q21      |   | 90                    | 3 D'Agostino & Pearson omnibus normality test | No                    |

|                                   |    |                       |                                               |                       |
|-----------------------------------|----|-----------------------|-----------------------------------------------|-----------------------|
| Q21 (NZ)                          | 90 |                       | 3 D'Agostino & Pearson omnibus normality test | Yes                   |
| <b>Figure S3: G (RIGHT)</b>       |    |                       |                                               |                       |
| Sample                            | n  | Biological replicates | Normality Test                                | Normally Distributed? |
| D21                               |    | 90                    | 3 D'Agostino & Pearson omnibus normality test | Yes                   |
| D21 (NZ)                          |    | 90                    | 3 D'Agostino & Pearson omnibus normality test | Yes                   |
| T21                               |    | 90                    | 3 D'Agostino & Pearson omnibus normality test | Yes                   |
| T21 (NZ)                          |    | 90                    | 3 D'Agostino & Pearson omnibus normality test | Yes                   |
| Q21                               |    | 90                    | 3 D'Agostino & Pearson omnibus normality test | Yes                   |
| Q21 (NZ)                          |    | 90                    | 3 D'Agostino & Pearson omnibus normality test | Yes                   |
| <b>Figure S3: H (LEFT)</b>        |    |                       |                                               |                       |
| Sample                            | n  | Biological replicates | Normality Test                                | Normally Distributed? |
| D21                               |    | 90                    | 3 D'Agostino & Pearson omnibus normality test | No                    |
| D21 (siPCNT)                      |    | 90                    | 3 D'Agostino & Pearson omnibus normality test | No                    |
| T21                               |    | 90                    | 3 D'Agostino & Pearson omnibus normality test | No                    |
| T21 (siPCNT)                      |    | 90                    | 3 D'Agostino & Pearson omnibus normality test | No                    |
| Q21                               |    | 90                    | 3 D'Agostino & Pearson omnibus normality test | No                    |
| Q21 (siPCNT)                      |    | 90                    | 3 D'Agostino & Pearson omnibus normality test | No                    |
| <b>Figure S3: H (MIDDLE)</b>      |    |                       |                                               |                       |
| Sample                            | n  | Biological replicates | Normality Test                                | Normally Distributed? |
| D21                               |    | 90                    | 3 D'Agostino & Pearson omnibus normality test | No                    |
| D21 (CD)                          |    | 90                    | 3 D'Agostino & Pearson omnibus normality test | No                    |
| T21                               |    | 90                    | 3 D'Agostino & Pearson omnibus normality test | No                    |
| T21 (CD)                          |    | 90                    | 3 D'Agostino & Pearson omnibus normality test | No                    |
| Q21                               |    | 90                    | 3 D'Agostino & Pearson omnibus normality test | No                    |
| Q21 (CD)                          |    | 90                    | 3 D'Agostino & Pearson omnibus normality test | No                    |
| <b>Figure S3: H (RIGHT)</b>       |    |                       |                                               |                       |
| Sample                            | n  | Biological replicates | Normality Test                                | Normally Distributed? |
| D21                               |    | 90                    | 3 D'Agostino & Pearson omnibus normality test | No                    |
| D21 (NZ)                          |    | 90                    | 3 D'Agostino & Pearson omnibus normality test | No                    |
| T21                               |    | 90                    | 3 D'Agostino & Pearson omnibus normality test | No                    |
| T21 (NZ)                          |    | 90                    | 3 D'Agostino & Pearson omnibus normality test | No                    |
| Q21                               |    | 90                    | 3 D'Agostino & Pearson omnibus normality test | No                    |
| Q21 (NZ)                          |    | 90                    | 3 D'Agostino & Pearson omnibus normality test | No                    |
| <b>Figure S3: J (LEFT)</b>        |    |                       |                                               |                       |
| Sample                            | n  | Biological replicates | Normality Test                                | Normally Distributed? |
| D21                               |    | 45                    | 3 D'Agostino & Pearson omnibus normality test | No                    |
| D21 (CD)                          |    | 45                    | 3 D'Agostino & Pearson omnibus normality test | No                    |
| T21                               |    | 45                    | 3 D'Agostino & Pearson omnibus normality test | No                    |
| T21 (CD)                          |    | 45                    | 3 D'Agostino & Pearson omnibus normality test | No                    |
| Q21                               |    | 45                    | 3 D'Agostino & Pearson omnibus normality test | No                    |
| Q21 (CD)                          |    | 45                    | 3 D'Agostino & Pearson omnibus normality test | No                    |
| <b>Figure S3: J (RIGHT)</b>       |    |                       |                                               |                       |
| Sample                            | n  | Biological replicates | Normality Test                                | Normally Distributed? |
| D21                               |    | 45                    | 3 D'Agostino & Pearson omnibus normality test | No                    |
| D21 (NZ)                          |    | 45                    | 3 D'Agostino & Pearson omnibus normality test | No                    |
| T21                               |    | 45                    | 3 D'Agostino & Pearson omnibus normality test | No                    |
| T21 (NZ)                          |    | 45                    | 3 D'Agostino & Pearson omnibus normality test | No                    |
| Q21                               |    | 45                    | 3 D'Agostino & Pearson omnibus normality test | No                    |
| Q21 (NZ)                          |    | 45                    | 3 D'Agostino & Pearson omnibus normality test | No                    |
| <b>Figure S3: K (TOP LEFT)</b>    |    |                       |                                               |                       |
| Sample                            | n  | Biological replicates | Normality Test                                | Normally Distributed? |
| T21                               |    | 92                    | 3 D'Agostino & Pearson omnibus normality test | Yes                   |
| T21 10MIN                         |    | 111                   | 3 D'Agostino & Pearson omnibus normality test | No                    |
| T21 24HR                          |    | 99                    | 3 D'Agostino & Pearson omnibus normality test | No                    |
| Q21                               |    | 101                   | 3 D'Agostino & Pearson omnibus normality test | No                    |
| Q21 10MIN                         |    | 102                   | 3 D'Agostino & Pearson omnibus normality test | Yes                   |
| Q21 24HR                          |    | 91                    | 3 D'Agostino & Pearson omnibus normality test | No                    |
| <b>Figure S3: K (TOP RIGHT)</b>   |    |                       |                                               |                       |
| Sample                            | n  | Biological replicates | Normality Test                                | Normally Distributed? |
| T21                               |    | 81                    | 3 D'Agostino & Pearson omnibus normality test | Yes                   |
| T21 10MIN                         |    | 116                   | 3 D'Agostino & Pearson omnibus normality test | Yes                   |
| T21 24HR                          |    | 102                   | 3 D'Agostino & Pearson omnibus normality test | No                    |
| Q21                               |    | 90                    | 3 D'Agostino & Pearson omnibus normality test | No                    |
| Q21 10MIN                         |    | 100                   | 3 D'Agostino & Pearson omnibus normality test | No                    |
| Q21 24HR                          |    | 97                    | 3 D'Agostino & Pearson omnibus normality test | Yes                   |
| <b>Figure S3: K (BOTTOM LEFT)</b> |    |                       |                                               |                       |
| Sample                            | n  | Biological replicates | Normality Test                                | Normally Distributed? |
| T21                               |    | 92                    | 3 D'Agostino & Pearson omnibus normality test | No                    |
| T21 10MIN                         |    | 111                   | 3 D'Agostino & Pearson omnibus normality test | No                    |
| T21 24HR                          |    | 99                    | 3 D'Agostino & Pearson omnibus normality test | No                    |
| Q21                               |    | 101                   | 3 D'Agostino & Pearson omnibus normality test | No                    |
| Q21 10MIN                         |    | 102                   | 3 D'Agostino & Pearson omnibus normality test | No                    |

|                                    |    |                       |                                               |                       |
|------------------------------------|----|-----------------------|-----------------------------------------------|-----------------------|
| Q21 24HR                           | 91 |                       | 3 D'Agostino & Pearson omnibus normality test | No                    |
| <b>Figure S3: K (BOTTOM RIGHT)</b> |    |                       |                                               |                       |
| Sample                             | n  | Biological replicates | Normality Test                                | Normally Distributed? |
| T21                                |    | 81                    | 3 D'Agostino & Pearson omnibus normality test | Yes                   |
| T21 10MIN                          |    | 116                   | 3 D'Agostino & Pearson omnibus normality test | No                    |
| T21 24HR                           |    | 102                   | 3 D'Agostino & Pearson omnibus normality test | No                    |
| Q21                                |    | 90                    | 3 D'Agostino & Pearson omnibus normality test | No                    |
| Q21 10MIN                          |    | 100                   | 3 D'Agostino & Pearson omnibus normality test | Yes                   |
| Q21 24HR                           |    | 97                    | 3 D'Agostino & Pearson omnibus normality test | No                    |
| <b>Figure 4: B</b>                 |    |                       |                                               |                       |
| Sample                             | n  | Biological replicates | Normality Test                                | Normally Distributed? |
| D21                                |    | 90                    | 3 D'Agostino & Pearson omnibus normality test | No                    |
| T21                                |    | 90                    | 3 D'Agostino & Pearson omnibus normality test | No                    |
| Q21                                |    | 90                    | 3 D'Agostino & Pearson omnibus normality test | No                    |
| <b>Figure 4: C</b>                 |    |                       |                                               |                       |
| Sample                             | n  | Biological replicates | Normality Test                                | Normally Distributed? |
| D21                                |    | 89                    | 3 D'Agostino & Pearson omnibus normality test | No                    |
| T21                                |    | 86                    | 3 D'Agostino & Pearson omnibus normality test | No                    |
| Q21                                |    | 96                    | 3 D'Agostino & Pearson omnibus normality test | No                    |
| <b>Figure 4: E</b>                 |    |                       |                                               |                       |
| Sample                             | n  | Biological replicates | Normality Test                                | Normally Distributed? |
| D21                                |    | 90                    | 3 D'Agostino & Pearson omnibus normality test | No                    |
| T21                                |    | 90                    | 3 D'Agostino & Pearson omnibus normality test | No                    |
| Q21                                |    | 90                    | 3 D'Agostino & Pearson omnibus normality test | No                    |
| <b>Figure 4: F</b>                 |    |                       |                                               |                       |
| Sample                             | n  | Biological replicates | Normality Test                                | Normally Distributed? |
| D21 (siPCNT)                       |    | 90                    | 3 D'Agostino & Pearson omnibus normality test | No                    |
| T21 (siPCNT)                       |    | 90                    | 3 D'Agostino & Pearson omnibus normality test | No                    |
| Q21 (siPCNT)                       |    | 90                    | 3 D'Agostino & Pearson omnibus normality test | No                    |
| <b>Figure 4: G (LEFT)</b>          |    |                       |                                               |                       |
| Sample                             | n  | Biological replicates | Normality Test                                | Normally Distributed? |
| T21                                |    | 45                    | 3 D'Agostino & Pearson omnibus normality test | Yes                   |
| T21 (siPCNT)                       |    | 45                    | 3 D'Agostino & Pearson omnibus normality test | Yes                   |
| Q21                                |    | 45                    | 3 D'Agostino & Pearson omnibus normality test | Yes                   |
| Q21 (siPCNT)                       |    | 45                    | 3 D'Agostino & Pearson omnibus normality test | No                    |
| <b>Figure 4: G (RIGHT)</b>         |    |                       |                                               |                       |
| Sample                             | n  | Biological replicates | Normality Test                                | Normally Distributed? |
| T21                                |    | 45                    | 3 D'Agostino & Pearson omnibus normality test | Yes                   |
| T21 (siPCNT)                       |    | 45                    | 3 D'Agostino & Pearson omnibus normality test | Yes                   |
| Q21                                |    | 45                    | 3 D'Agostino & Pearson omnibus normality test | Yes                   |
| Q21 (siPCNT)                       |    | 45                    | 3 D'Agostino & Pearson omnibus normality test | No                    |
| <b>Figure 4: I</b>                 |    |                       |                                               |                       |
| Sample                             | n  | Biological replicates | Normality Test                                | Normally Distributed? |
| D21 (CD)                           |    | 90                    | 3 D'Agostino & Pearson omnibus normality test | No                    |
| T21 (CD)                           |    | 90                    | 3 D'Agostino & Pearson omnibus normality test | No                    |
| Q21 (CD)                           |    | 90                    | 3 D'Agostino & Pearson omnibus normality test | No                    |
| <b>Figure 4: J (LEFT)</b>          |    |                       |                                               |                       |
| Sample                             | n  | Biological replicates | Normality Test                                | Normally Distributed? |
| T21                                |    | 45                    | 3 D'Agostino & Pearson omnibus normality test | Yes                   |
| T21 (CD)                           |    | 45                    | 3 D'Agostino & Pearson omnibus normality test | Yes                   |
| Q21                                |    | 45                    | 3 D'Agostino & Pearson omnibus normality test | No                    |
| Q21 (CD)                           |    | 45                    | 3 D'Agostino & Pearson omnibus normality test | Yes                   |
| <b>Figure 4: J (RIGHT)</b>         |    |                       |                                               |                       |
| Sample                             | n  | Biological replicates | Normality Test                                | Normally Distributed? |
| T21                                |    | 45                    | 3 D'Agostino & Pearson omnibus normality test | Yes                   |
| T21 (CD)                           |    | 45                    | 3 D'Agostino & Pearson omnibus normality test | Yes                   |
| Q21                                |    | 45                    | 3 D'Agostino & Pearson omnibus normality test | No                    |
| Q21 (CD)                           |    | 45                    | 3 D'Agostino & Pearson omnibus normality test | Yes                   |
| <b>Figure 4: K</b>                 |    |                       |                                               |                       |
| Sample                             | n  | Biological replicates | Normality Test                                | Normally Distributed? |
| D21 (NZ)                           |    | 90                    | 3 D'Agostino & Pearson omnibus normality test | No                    |
| T21 (NZ)                           |    | 90                    | 3 D'Agostino & Pearson omnibus normality test | No                    |
| Q21 (NZ)                           |    | 90                    | 3 D'Agostino & Pearson omnibus normality test | No                    |
| <b>Figure 4: L (LEFT)</b>          |    |                       |                                               |                       |
| Sample                             | n  | Biological replicates | Normality Test                                | Normally Distributed? |
| T21                                |    | 45                    | 3 D'Agostino & Pearson omnibus normality test | Yes                   |
| T21 (NZ)                           |    | 45                    | 3 D'Agostino & Pearson omnibus normality test | Yes                   |
| Q21                                |    | 45                    | 3 D'Agostino & Pearson omnibus normality test | Yes                   |



|                                                  |    |                       |                                               |                       |
|--------------------------------------------------|----|-----------------------|-----------------------------------------------|-----------------------|
| Q21 (NZ)                                         | 45 |                       | 3 D'Agostino & Pearson omnibus normality test | No                    |
| <b>Figure 4: L (RIGHT)</b>                       |    |                       |                                               |                       |
| Sample                                           | n  | Biological replicates | Normality Test                                | Normally Distributed? |
| T21                                              |    | 45                    | 3 D'Agostino & Pearson omnibus normality test | Yes                   |
| T21 (NZ)                                         |    | 45                    | 3 D'Agostino & Pearson omnibus normality test | Yes                   |
| Q21                                              |    | 45                    | 3 D'Agostino & Pearson omnibus normality test | Yes                   |
| Q21 (NZ)                                         |    | 45                    | 3 D'Agostino & Pearson omnibus normality test | Yes                   |
| <b>Figure S4: B</b>                              |    |                       |                                               |                       |
| Sample                                           | n  | Biological replicates | Normality Test                                | Normally Distributed? |
| D21 siPCM1                                       |    | 126                   | 4 D'Agostino & Pearson omnibus normality test | No                    |
| T21 siPCM1                                       |    | 159                   | 4 D'Agostino & Pearson omnibus normality test | No                    |
| Q21 siPCM1                                       |    | 178                   | 4 D'Agostino & Pearson omnibus normality test | No                    |
| <b>Figure S4: D (LEFT; CEP290, CEP131, PCNT)</b> |    |                       |                                               |                       |
| Sample                                           | n  | Biological replicates | Normality Test                                | Normally Distributed? |
| D21                                              |    | 45                    | 3 NA                                          | NA                    |
| T21                                              |    | 45                    | 3 NA                                          | NA                    |
| Q21                                              |    | 45                    | 3 NA                                          | NA                    |
| <b>Figure S4: D (RIGHT; PCM1, CEP131, PCNT)</b>  |    |                       |                                               |                       |
| Sample                                           | n  | Biological replicates | Normality Test                                | Normally Distributed? |
| D21                                              |    | 45                    | 3 NA                                          | NA                    |
| T21                                              |    | 45                    | 3 NA                                          | NA                    |
| Q21                                              |    | 45                    | 3 NA                                          | NA                    |
| <b>Figure S4: G (TOP LEFT)</b>                   |    |                       |                                               |                       |
| Sample                                           | n  | Biological replicates | Normality Test                                | Normally Distributed? |
| D21                                              |    | 123                   | 4 D'Agostino & Pearson omnibus normality test | No                    |
| T21                                              |    | 125                   | 4 D'Agostino & Pearson omnibus normality test | No                    |
| Q21                                              |    | 144                   | 4 D'Agostino & Pearson omnibus normality test | No                    |
| D21 CD                                           |    | 87                    | 4 D'Agostino & Pearson omnibus normality test | No                    |
| T21 CD                                           |    | 91                    | 4 D'Agostino & Pearson omnibus normality test | No                    |
| Q21 CD                                           |    | 88                    | 4 D'Agostino & Pearson omnibus normality test | No                    |
| D21 NZ                                           |    | 87                    | 4 D'Agostino & Pearson omnibus normality test | No                    |
| T21 NZ                                           |    | 90                    | 4 D'Agostino & Pearson omnibus normality test | No                    |
| Q21 NZ                                           |    | 92                    | 4 D'Agostino & Pearson omnibus normality test | No                    |
| <b>Figure S4: G (TOP MIDDLE)</b>                 |    |                       |                                               |                       |
| Sample                                           | n  | Biological replicates | Normality Test                                | Normally Distributed? |
| D21                                              |    | 136                   | 3 D'Agostino & Pearson omnibus normality test | No                    |
| T21                                              |    | 147                   | 3 D'Agostino & Pearson omnibus normality test | No                    |
| Q21                                              |    | 143                   | 3 D'Agostino & Pearson omnibus normality test | No                    |
| D21 CD                                           |    | 136                   | 3 D'Agostino & Pearson omnibus normality test | No                    |
| T21 CD                                           |    | 160                   | 3 D'Agostino & Pearson omnibus normality test | No                    |
| Q21 CD                                           |    | 135                   | 3 D'Agostino & Pearson omnibus normality test | No                    |
| D21 NZ                                           |    | 120                   | 3 D'Agostino & Pearson omnibus normality test | No                    |
| T21 NZ                                           |    | 143                   | 3 D'Agostino & Pearson omnibus normality test | No                    |
| Q21 NZ                                           |    | 148                   | 3 D'Agostino & Pearson omnibus normality test | No                    |
| <b>Figure S4: G (TOP RIGHT)</b>                  |    |                       |                                               |                       |
| Sample                                           | n  | Biological replicates | Normality Test                                | Normally Distributed? |
| D21                                              |    | 130                   | 3 D'Agostino & Pearson omnibus normality test | No                    |
| T21                                              |    | 134                   | 3 D'Agostino & Pearson omnibus normality test | No                    |
| Q21                                              |    | 150                   | 3 D'Agostino & Pearson omnibus normality test | No                    |
| D21 CD                                           |    | 149                   | 3 D'Agostino & Pearson omnibus normality test | No                    |
| T21 CD                                           |    | 139                   | 3 D'Agostino & Pearson omnibus normality test | No                    |
| Q21 CD                                           |    | 135                   | 3 D'Agostino & Pearson omnibus normality test | No                    |
| D21 NZ                                           |    | 130                   | 3 D'Agostino & Pearson omnibus normality test | No                    |
| T21 NZ                                           |    | 143                   | 3 D'Agostino & Pearson omnibus normality test | No                    |
| Q21 NZ                                           |    | 150                   | 3 D'Agostino & Pearson omnibus normality test | No                    |
| <b>Figure S4: G (BOTTOM LEFT)</b>                |    |                       |                                               |                       |
| Sample                                           | n  | Biological replicates | Normality Test                                | Normally Distributed? |
| D21                                              |    | 108                   | 4 D'Agostino & Pearson omnibus normality test | No                    |
| T21                                              |    | 111                   | 4 D'Agostino & Pearson omnibus normality test | No                    |
| Q21                                              |    | 128                   | 4 D'Agostino & Pearson omnibus normality test | No                    |
| D21 CD                                           |    | 66                    | 4 D'Agostino & Pearson omnibus normality test | No                    |
| T21 CD                                           |    | 75                    | 4 D'Agostino & Pearson omnibus normality test | No                    |
| Q21 CD                                           |    | 78                    | 4 D'Agostino & Pearson omnibus normality test | No                    |
| D21 NZ                                           |    | 84                    | 4 D'Agostino & Pearson omnibus normality test | No                    |
| T21 NZ                                           |    | 87                    | 4 D'Agostino & Pearson omnibus normality test | Yes                   |
| Q21 NZ                                           |    | 89                    | 4 D'Agostino & Pearson omnibus normality test | Yes                   |
| <b>Figure S4: G (BOTTOM MIDDLE)</b>              |    |                       |                                               |                       |
| Sample                                           | n  | Biological replicates | Normality Test                                | Normally Distributed? |
| D21                                              |    | 136                   | 3 D'Agostino & Pearson omnibus normality test | No                    |
| T21                                              |    | 146                   | 3 D'Agostino & Pearson omnibus normality test | No                    |
| Q21                                              |    | 143                   | 3 D'Agostino & Pearson omnibus normality test | No                    |
| D21 CD                                           |    | 137                   | 3 D'Agostino & Pearson omnibus normality test | No                    |

|        |     |                                               |    |
|--------|-----|-----------------------------------------------|----|
| T21 CD | 160 | 3 D'Agostino & Pearson omnibus normality test | No |
| Q21 CD | 137 | 3 D'Agostino & Pearson omnibus normality test | No |
| D21 NZ | 120 | 3 D'Agostino & Pearson omnibus normality test | No |
| T21 NZ | 143 | 3 D'Agostino & Pearson omnibus normality test | No |
| Q21 NZ | 150 | 3 D'Agostino & Pearson omnibus normality test | No |

**Figure S4: G (BOTTOM RIGHT)**

| Sample | n   | Biological replicates | Normality Test                                | Normally Distributed? |
|--------|-----|-----------------------|-----------------------------------------------|-----------------------|
| D21    | 126 |                       | 3 D'Agostino & Pearson omnibus normality test | No                    |
| T21    | 145 |                       | 3 D'Agostino & Pearson omnibus normality test | No                    |
| Q21    | 154 |                       | 3 D'Agostino & Pearson omnibus normality test | No                    |
| D21 CD | 143 |                       | 3 D'Agostino & Pearson omnibus normality test | No                    |
| T21 CD | 143 |                       | 3 D'Agostino & Pearson omnibus normality test | No                    |
| Q21 CD | 142 |                       | 3 D'Agostino & Pearson omnibus normality test | No                    |
| D21 NZ | 125 |                       | 3 D'Agostino & Pearson omnibus normality test | No                    |
| T21 NZ | 135 |                       | 3 D'Agostino & Pearson omnibus normality test | No                    |
| Q21 NZ | 151 |                       | 3 D'Agostino & Pearson omnibus normality test | No                    |

**P-VALUES**

**Figure 1: B**

| Samples compared | Statistical test     | p-value |
|------------------|----------------------|---------|
| D21 v T21        | Student's two tailed | 0.0478  |
| D21 v Q21        | Student's two tailed | 0.0051  |

**Figure 1: D**

| Samples compared                    | Statistical test   | p-value |
|-------------------------------------|--------------------|---------|
| D21 (ciliated) V T21 (ciliated)     | Mann-Whitney U tes | 0.0252  |
| D21 (ciliated) V Q21 (ciliated)     | Mann-Whitney U tes | 0.0000  |
| D21 (unciliated) V T21 (unciliated) | Mann-Whitney U tes | 0.0000  |
| D21 (unciliated) V Q21 (unciliated) | Mann-Whitney U tes | 0.0000  |
| D21 (combined) V T21 (combined)     | Mann-Whitney U tes | 0.0000  |
| D21 (combined) V Q21 (combined)     | Mann-Whitney U tes | 0.0000  |

**Figure 1: E (LEFT GRAPH)**

| Samples compared              | Statistical test   | p-value |
|-------------------------------|--------------------|---------|
| D21 V D21 (siPCNT)            | Mann-Whitney U tes | 0.0000  |
| T21 V T21 (siPCNT)            | Mann-Whitney U tes | 0.0000  |
| Q21 V Q21 (siPCNT)            | Mann-Whitney U tes | 0.0000  |
| T21 (3n PCNT) V T21 (2n PCNT) | Mann-Whitney U tes | 0.0000  |

**Figure 1: E (RIGHT GRAPH)**

| Samples compared              | Statistical test     | p-value |
|-------------------------------|----------------------|---------|
| D21 V D21 (siPCNT)            | Student's two tailed | 0.5377  |
| T21 V T21 (siPCNT)            | Student's two tailed | 0.0082  |
| Q21 V Q21 (siPCNT)            | Student's two tailed | 0.0092  |
| T21 (3n PCNT) V T21 (2n PCNT) | Student's two tailed | 0.0866  |

**Figure S1: B**

| Samples compared | Statistical test   | p-value |
|------------------|--------------------|---------|
| D21 v T21        | Mann-Whitney U tes | 0.31    |
| D21 v Q21        | Mann-Whitney U tes | 0.1034  |

**Figure S1: D**

| Samples compared | Statistical test   | p-value |
|------------------|--------------------|---------|
| D21 v T21        | Mann-Whitney U tes | 0.0000  |
| D21 v Q21        | Mann-Whitney U tes | 0.0000  |

**Figure S1: E**

| Samples compared | Statistical test     | p-value |
|------------------|----------------------|---------|
| D21 v T21        | Student's two tailed | 0.9198  |
| D21 v Q21        | Student's two tailed | 0.6001  |

**Figure S1: F**

| Samples compared | Statistical test   | p-value |
|------------------|--------------------|---------|
| D21 v T21        | Mann-Whitney U tes | 0.6515  |
| D21 v Q21        | Mann-Whitney U tes | 0.0012  |

**Figure 2: C**

| Samples compared                     | Statistical test   | p-value |
|--------------------------------------|--------------------|---------|
| D21 (ciliated) V D21 (unciliated): A | Mann-Whitney U tes | 0.0042  |
| D21 (ciliated) V D21 (unciliated): B | Mann-Whitney U tes | 0.0328  |
| D21 (ciliated) V D21 (unciliated): C | Mann-Whitney U tes | 0.0483  |
| D21 (ciliated) V D21 (unciliated): D | Mann-Whitney U tes | 0.4313  |
| D21 (ciliated) V T21 (ciliated): A   | Mann-Whitney U tes | 0.0468  |
| D21 (ciliated) V T21 (ciliated): B   | Mann-Whitney U tes | 0.1828  |
| D21 (ciliated) V T21 (ciliated): C   | Mann-Whitney U tes | 0.2519  |

|                                      |                    |         |  |
|--------------------------------------|--------------------|---------|--|
| D21 (ciliated) V T21 (ciliated): D   | Mann-Whitney U tes | 0.3047  |  |
| D21 (ciliated) V T21 (unciliated): A | Mann-Whitney U tes | 0.02131 |  |
| D21 (ciliated) V T21 (unciliated): B | Mann-Whitney U tes | 0.0403  |  |
| D21 (ciliated) V T21 (unciliated): C | Mann-Whitney U tes | 0.1113  |  |
| D21 (ciliated) V T21 (unciliated): D | Mann-Whitney U tes | 0.2416  |  |
| D21 (ciliated) V Q21 (ciliated): A   | Mann-Whitney U tes | 0.0055  |  |
| D21 (ciliated) V Q21 (ciliated): B   | Mann-Whitney U tes | 0.0188  |  |
| D21 (ciliated) V Q21 (ciliated): C   | Mann-Whitney U tes | 0.0902  |  |
| D21 (ciliated) V Q21 (ciliated): D   | Mann-Whitney U tes | 0.2610  |  |
| D21 (ciliated) V Q21 (unciliated): A | Mann-Whitney U tes | 0.0049  |  |
| D21 (ciliated) V Q21 (unciliated): B | Mann-Whitney U tes | 0.0211  |  |
| D21 (ciliated) V Q21 (unciliated): C | Mann-Whitney U tes | 0.0473  |  |
| D21 (ciliated) V Q21 (unciliated): D | Mann-Whitney U tes | 0.2002  |  |

**Figure 2: D**

| Samples compared                  | Statistical test   | p-value |  |
|-----------------------------------|--------------------|---------|--|
| D21 (ciliated) v D21 (unciliated) | Mann-Whitney U tes | 0.1951  |  |
| D21 (ciliated) v T21 (ciliated)   | Mann-Whitney U tes | 0.5035  |  |
| D21 (ciliated) v T21 (unciliated) | Mann-Whitney U tes | 0.1906  |  |
| D21 (ciliated) v Q21 (ciliated)   | Mann-Whitney U tes | 0.8506  |  |
| D21 (ciliated) v Q21 (unciliated) | Mann-Whitney U tes | 0.0537  |  |

**Figure 2: F**

| Samples compared                  | Statistical test   | p-value |  |
|-----------------------------------|--------------------|---------|--|
| T21 V T21 (2n PCNT) ciliated: A   | Mann-Whitney U tes | 0.0145  |  |
| T21 V T21 (2n PCNT) ciliated: B   | Mann-Whitney U tes | 0.0438  |  |
| T21 V T21 (2n PCNT) ciliated: C   | Mann-Whitney U tes | 0.6502  |  |
| T21 V T21 (2n PCNT) ciliated: D   | Mann-Whitney U tes | 0.0431  |  |
| T21 V T21 (2n PCNT) unciliated: A | Mann-Whitney U tes | 0.0138  |  |
| T21 V T21 (2n PCNT) unciliated: B | Mann-Whitney U tes | 0.2821  |  |
| T21 V T21 (2n PCNT) unciliated: C | Mann-Whitney U tes | 0.3365  |  |
| T21 V T21 (2n PCNT) unciliated: D | Mann-Whitney U tes | 0.0482  |  |
| T21 V T21 (siPCNT) ciliated : A   | Mann-Whitney U tes | 0.0219  |  |
| T21 V T21 (siPCNT) ciliated : B   | Mann-Whitney U tes | 0.0021  |  |
| T21 V T21 (siPCNT) ciliated : C   | Mann-Whitney U tes | 0.0110  |  |
| T21 V T21 (siPCNT) ciliated : D   | Mann-Whitney U tes | 0.0980  |  |
| T21 V T21 (siPCNT) unciliated : A | Mann-Whitney U tes | 0.0335  |  |
| T21 V T21 (siPCNT) unciliated : B | Mann-Whitney U tes | 0.0021  |  |
| T21 V T21 (siPCNT) unciliated : C | Mann-Whitney U tes | 0.0063  |  |
| T21 V T21 (siPCNT) unciliated : D | Mann-Whitney U tes | 0.1200  |  |
| Q21 V Q21 (siPCNT) ciliated : A   | Mann-Whitney U tes | 0.0076  |  |
| Q21 V Q21 (siPCNT) ciliated : B   | Mann-Whitney U tes | 0.0004  |  |
| Q21 V Q21 (siPCNT) ciliated : C   | Mann-Whitney U tes | 0.0008  |  |
| Q21 V Q21 (siPCNT) ciliated : D   | Mann-Whitney U tes | 0.0223  |  |
| Q21 V Q21 (siPCNT) unciliated : A | Mann-Whitney U tes | 0.0060  |  |
| Q21 V Q21 (siPCNT) unciliated : B | Mann-Whitney U tes | 0.0009  |  |
| Q21 V Q21 (siPCNT) unciliated : C | Mann-Whitney U tes | 0.0013  |  |
| Q21 V Q21 (siPCNT) unciliated : D | Mann-Whitney U tes | 0.0236  |  |

**Figure 2: G (LEFT)**

| Samples compared | Statistical test     | p-value |  |
|------------------|----------------------|---------|--|
| D21 v T21        | Student's two tailed | 0.0000  |  |
| D21 v Q21        | Student's two tailed | 0.0000  |  |

**Figure 2: G (RIGHT)**

| Samples compared | Statistical test   | p-value |  |
|------------------|--------------------|---------|--|
| D21 v T21        | Mann-Whitney U tes | 0.0000  |  |
| D21 v Q21        | Mann-Whitney U tes | 0.0000  |  |

**Figure S2: A (TOP)**

| Samples compared                     | Statistical test     | p-value |  |
|--------------------------------------|----------------------|---------|--|
| D21 (ciliated) V D21 (unciliated): A | Mann-Whitney U tes   | 0.0042  |  |
| D21 (ciliated) V D21 (unciliated): B | Mann-Whitney U tes   | 0.0328  |  |
| D21 (ciliated) V D21 (unciliated): C | Mann-Whitney U tes   | 0.0483  |  |
| D21 (ciliated) V D21 (unciliated): D | Mann-Whitney U tes   | 0.4313  |  |
| T21 (ciliated) V T21 (unciliated): A | Student's two tailed | 0.0076  |  |
| T21 (ciliated) V T21 (unciliated): B | Student's two tailed | 0.0471  |  |
| T21 (ciliated) V T21 (unciliated): C | Student's two tailed | 0.2079  |  |
| T21 (ciliated) V T21 (unciliated): D | Student's two tailed | 0.3326  |  |
| Q21 (ciliated) V Q21 (unciliated): A | Mann-Whitney U tes   | 0.0273  |  |
| Q21 (ciliated) V Q21 (unciliated): B | Mann-Whitney U tes   | 0.0423  |  |
| Q21 (ciliated) V Q21 (unciliated): C | Mann-Whitney U tes   | 0.1677  |  |
| Q21 (ciliated) V Q21 (unciliated): D | Mann-Whitney U tes   | 0.3050  |  |

**Figure S2: D**

| Samples compared | Statistical test   | p-value |  |
|------------------|--------------------|---------|--|
| D21 V T21        | Mann-Whitney U tes | 0.0000  |  |
| D21 V Q21        | Mann-Whitney U tes | 0.0000  |  |

**Figure S2: E (TOP)**

| Samples compared | Statistical test | p-value |  |
|------------------|------------------|---------|--|
|------------------|------------------|---------|--|

|                                      |                      |         |  |
|--------------------------------------|----------------------|---------|--|
| D21 V T21                            | Mann-Whitney U tes   | 0.0006  |  |
| D21 V Q21                            | Mann-Whitney U tes   | 0.0000  |  |
| <b>Figure S2: E (BOTTOM)</b>         |                      |         |  |
| Samples compared                     | Statistical test     | p-value |  |
| D21 V T21                            | Mann-Whitney U tes   | 0.6371  |  |
| D21 V Q21                            | Mann-Whitney U tes   | 0.3966  |  |
| <b>Figure S2: G (LEFT)</b>           |                      |         |  |
| Samples compared                     | Statistical test     | p-value |  |
| D21 V T21                            | Mann-Whitney U tes   | 0.0000  |  |
| D21 V Q21                            | Mann-Whitney U tes   | 0.0000  |  |
| <b>Figure S2: G (RIGHT)</b>          |                      |         |  |
| Samples compared                     | Statistical test     | p-value |  |
| D21 V T21                            | Mann-Whitney U tes   | 0.0000  |  |
| D21 V Q21                            | Mann-Whitney U tes   | 0.0000  |  |
| <b>Figure S2: H (TUBULIN)</b>        |                      |         |  |
| Samples compared                     | Statistical test     | p-value |  |
| D21 V T21                            | Mann-Whitney U tes   | 0.2701  |  |
| D21 V Q21                            | Student's two tailed | 0.0104  |  |
| <b>Figure S2: H (AC. TUBULIN)</b>    |                      |         |  |
| Samples compared                     | Statistical test     | p-value |  |
| D21 V T21                            | Mann-Whitney U tes   | 0.2842  |  |
| D21 V Q21                            | Mann-Whitney U tes   | 0.0899  |  |
| <b>Figure S2: H (GLUT. TUBULIN)</b>  |                      |         |  |
| Samples compared                     | Statistical test     | p-value |  |
| D21 V T21                            | Mann-Whitney U tes   | 0.1339  |  |
| D21 V Q21                            | Mann-Whitney U tes   | 0.7754  |  |
| <b>Figure S2: H (DETYR. TUBULIN)</b> |                      |         |  |
| Samples compared                     | Statistical test     | p-value |  |
| D21 V T21                            | Mann-Whitney U tes   | 0.3901  |  |
| D21 V Q21                            | Mann-Whitney U tes   | 0.0025  |  |
| <b>Figure S2: I (TOP)</b>            |                      |         |  |
| Samples compared                     | Statistical test     | p-value |  |
| D21 V T21                            | Mann-Whitney U tes   | 0.0000  |  |
| D21 V Q21                            | Mann-Whitney U tes   | 0.0000  |  |
| <b>Figure S2: I (BOTTOM)</b>         |                      |         |  |
| Samples compared                     | Statistical test     | p-value |  |
| D21 V T21                            | Mann-Whitney U tes   | 0.6313  |  |
| D21 V Q21                            | Mann-Whitney U tes   | 0.335   |  |
| <b>Figure S2: K (LEFT)</b>           |                      |         |  |
| Samples compared                     | Statistical test     | p-value |  |
| D21 V T21 (1.2um)                    | Student's two tailed | 0.5524  |  |
| D21 V Q21 (1.2um)                    | Student's two tailed | 0.3237  |  |
| D21 V T21 (2.0um)                    | Student's two tailed | 0.6223  |  |
| D21 V Q21 (2.0um)                    | Student's two tailed | 0.3895  |  |
| D21 V T21 (5.0um)                    | Student's two tailed | 0.9927  |  |
| D21 V Q21 (5.0um)                    | Student's two tailed | 0.8972  |  |
| <b>Figure S2: K (RIGHT)</b>          |                      |         |  |
| Samples compared                     | Statistical test     | p-value |  |
| D21 V T21 (0.5-1.2um)                | Student's two tailed | 0.0656  |  |
| D21 V Q21 (0.5-1.2um)                | Student's two tailed | 0.0372  |  |
| D21 V T21 (1.2-2.0um)                | Student's two tailed | 0.4227  |  |
| D21 V Q21 (1.2-2.0um)                | Student's two tailed | 0.6133  |  |
| D21 V T21 (2.0-5.0um)                | Student's two tailed | 0.4346  |  |
| D21 V Q21 (2.0-5.0um)                | Student's two tailed | 0.4859  |  |
| <b>Figure 3: B</b>                   |                      |         |  |
| Samples compared                     | Statistical test     | p-value |  |
| D21 (ciliated) V D21 (unciliated): A | Mann-Whitney U tes   | 0.2480  |  |
| D21 (ciliated) V D21 (unciliated): B | Mann-Whitney U tes   | 0.0685  |  |
| D21 (ciliated) V D21 (unciliated): C | Mann-Whitney U tes   | 0.0115  |  |
| D21 (ciliated) V D21 (unciliated): D | Mann-Whitney U tes   | 0.0335  |  |
| D21 (ciliated) V T21 (ciliated): A   | Mann-Whitney U tes   | 0.0820  |  |
| D21 (ciliated) V T21 (ciliated): B   | Mann-Whitney U tes   | 0.1122  |  |
| D21 (ciliated) V T21 (ciliated): C   | Mann-Whitney U tes   | 0.0493  |  |
| D21 (ciliated) V T21 (ciliated): D   | Mann-Whitney U tes   | 0.0989  |  |
| D21 (ciliated) V T21 (unciliated): A | Mann-Whitney U tes   | 0.0729  |  |
| D21 (ciliated) V T21 (unciliated): B | Mann-Whitney U tes   | 0.0714  |  |
| D21 (ciliated) V T21 (unciliated): C | Mann-Whitney U tes   | 0.0398  |  |
| D21 (ciliated) V T21 (unciliated): D | Mann-Whitney U tes   | 0.0237  |  |

|                                      |                      |         |  |
|--------------------------------------|----------------------|---------|--|
| D21 (ciliated) V Q21 (ciliated): A   | Mann-Whitney U tes   | 0.7526  |  |
| D21 (ciliated) V Q21 (ciliated): B   | Mann-Whitney U tes   | 0.2302  |  |
| D21 (ciliated) V Q21 (ciliated): C   | Mann-Whitney U tes   | 0.1703  |  |
| D21 (ciliated) V Q21 (ciliated): D   | Mann-Whitney U tes   | 0.2965  |  |
| D21 (ciliated) V Q21 (unciliated): A | Mann-Whitney U tes   | 0.4068  |  |
| D21 (ciliated) V Q21 (unciliated): B | Mann-Whitney U tes   | 0.1872  |  |
| D21 (ciliated) V Q21 (unciliated): C | Mann-Whitney U tes   | 0.0428  |  |
| D21 (ciliated) V Q21 (unciliated): D | Mann-Whitney U tes   | 0.0422  |  |
| <b>Figure 3: D (LEFT)</b>            |                      |         |  |
| Samples compared                     | Statistical test     | p-value |  |
| D21 V T21                            | Mann-Whitney U tes   | 0.0299  |  |
| D21 V Q21                            | Mann-Whitney U tes   | 0.0003  |  |
| <b>Figure 3: D (RIGHT)</b>           |                      |         |  |
| Samples compared                     | Statistical test     | p-value |  |
| D21 V T21                            | Student's two tailed | 0.0000  |  |
| D21 V Q21                            | Student's two tailed | 0.0000  |  |
| <b>Figure 3: F (LEFT)</b>            |                      |         |  |
| Samples compared                     | Statistical test     | p-value |  |
| D21 V D21 (siPCNT)                   | Mann-Whitney U tes   | 0.0660  |  |
| T21 V T21 (siPCNT)                   | Student's two tailed | 0.0000  |  |
| Q21 V Q21 (siPCNT)                   | Mann-Whitney U tes   | 0.0000  |  |
| T21 (3n PCNT) V T21 (2n PCNT)        | Mann-Whitney U tes   | 0.0000  |  |
| <b>Figure 3: F (RIGHT)</b>           |                      |         |  |
| Samples compared                     | Statistical test     | p-value |  |
| D21 V D21 (siPCNT)                   | Mann-Whitney U tes   | 0.0000  |  |
| T21 V T21 (siPCNT)                   | Student's two tailed | 0.0000  |  |
| Q21 V Q21 (siPCNT)                   | Student's two tailed | 0.0000  |  |
| <b>Figure 3: I</b>                   |                      |         |  |
| Samples compared                     | Statistical test     | p-value |  |
| D21 V D21 (CD) ciliated: A           | Mann-Whitney U tes   | 0.1356  |  |
| D21 V D21 (CD) ciliated: B           | Mann-Whitney U tes   | 0.3434  |  |
| D21 V D21 (CD) ciliated: C           | Mann-Whitney U tes   | 0.4654  |  |
| D21 V D21 (CD) ciliated: D           | Mann-Whitney U tes   | 0.5029  |  |
| D21 V D21 (CD) unciliated: A         | Mann-Whitney U tes   | 0.6125  |  |
| D21 V D21 (CD) unciliated: B         | Mann-Whitney U tes   | 0.0889  |  |
| D21 V D21 (CD) unciliated: C         | Mann-Whitney U tes   | 0.4310  |  |
| D21 V D21 (CD) unciliated: D         | Mann-Whitney U tes   | 0.7122  |  |
| T21 V T21 (CD) ciliated: A           | Mann-Whitney U tes   | 0.0803  |  |
| T21 V T21 (CD) ciliated: B           | Mann-Whitney U tes   | 0.1245  |  |
| T21 V T21 (CD) ciliated: C           | Mann-Whitney U tes   | 0.2175  |  |
| T21 V T21 (CD) ciliated: D           | Mann-Whitney U tes   | 0.3114  |  |
| T21 V T21 (CD) unciliated: A         | Mann-Whitney U tes   | 0.1523  |  |
| T21 V T21 (CD) unciliated: B         | Mann-Whitney U tes   | 0.3735  |  |
| T21 V T21 (CD) unciliated: C         | Mann-Whitney U tes   | 0.5577  |  |
| T21 V T21 (CD) unciliated: D         | Mann-Whitney U tes   | 0.5208  |  |
| Q21 V Q21 (CD) ciliated: A           | Mann-Whitney U tes   | 0.0098  |  |
| Q21 V Q21 (CD) ciliated: B           | Mann-Whitney U tes   | 0.0488  |  |
| Q21 V Q21 (CD) ciliated: C           | Mann-Whitney U tes   | 0.0469  |  |
| Q21 V Q21 (CD) ciliated: D           | Mann-Whitney U tes   | 0.2203  |  |
| Q21 V Q21 (CD) unciliated: A         | Mann-Whitney U tes   | 0.1541  |  |
| Q21 V Q21 (CD) unciliated: B         | Mann-Whitney U tes   | 0.3308  |  |
| Q21 V Q21 (CD) unciliated: C         | Mann-Whitney U tes   | 0.1122  |  |
| Q21 V Q21 (CD) unciliated: D         | Mann-Whitney U tes   | 0.1744  |  |
| <b>Figure 3: J</b>                   |                      |         |  |
| Samples compared                     | Statistical test     | p-value |  |
| D21 V D21 (CD)                       | Student's two tailed | 0.2829  |  |
| T21 V T21 (CD)                       | Student's two tailed | 0.0040  |  |
| Q21 V Q21 (CD)                       | Student's two tailed | 0.0135  |  |
| <b>Figure 3: K (LEFT)</b>            |                      |         |  |
| Samples compared                     | Statistical test     | p-value |  |
| D21 V D21 (CD)                       | Mann-Whitney U tes   | 0.0000  |  |
| T21 V T21 (CD)                       | Mann-Whitney U tes   | 0.0000  |  |
| Q21 V Q21 (CD)                       | Mann-Whitney U tes   | 0.0000  |  |
| <b>Figure 3: K (RIGHT)</b>           |                      |         |  |
| Samples compared                     | Statistical test     | p-value |  |
| D21 V D21 (CD)                       | Mann-Whitney U tes   | 0.3688  |  |
| T21 V T21 (CD)                       | Student's two tailed | 0.0000  |  |
| Q21 V Q21 (CD)                       | Student's two tailed | 0.0000  |  |
| <b>Figure S3: A</b>                  |                      |         |  |
| Samples compared                     | Statistical test     | p-value |  |
| D21 (ciliated) V D21 (unciliated): A | Mann-Whitney U tes   | 0.2480  |  |
| D21 (ciliated) V D21 (unciliated): B | Mann-Whitney U tes   | 0.0685  |  |

|                                      |                      |         |  |
|--------------------------------------|----------------------|---------|--|
| D21 (ciliated) V D21 (unciliated): C | Mann-Whitney U tes   | 0.0115  |  |
| D21 (ciliated) V D21 (unciliated): D | Mann-Whitney U tes   | 0.0335  |  |
| T21 (ciliated) V T21 (unciliated): A | Mann-Whitney U tes   | 0.0485  |  |
| T21 (ciliated) V T21 (unciliated): B | Mann-Whitney U tes   | 0.0151  |  |
| T21 (ciliated) V T21 (unciliated): C | Mann-Whitney U tes   | 0.5449  |  |
| T21 (ciliated) V T21 (unciliated): D | Mann-Whitney U tes   | 0.0139  |  |
| Q21 (ciliated) V Q21 (unciliated): A | Mann-Whitney U tes   | 0.0223  |  |
| Q21 (ciliated) V Q21 (unciliated): B | Mann-Whitney U tes   | 0.0320  |  |
| Q21 (ciliated) V Q21 (unciliated): C | Mann-Whitney U tes   | 0.2312  |  |
| Q21 (ciliated) V Q21 (unciliated): D | Mann-Whitney U tes   | 0.0248  |  |
| <b>Figure S3: B</b>                  |                      |         |  |
| Samples compared                     | Statistical test     | p-value |  |
| D21 correlation                      | Student's two tailed | 0.0000  |  |
| T21 correlation                      | Student's two tailed | 0.1269  |  |
| Q21 correlation                      | Student's two tailed | 0.0000  |  |
| <b>Figure S3: E</b>                  |                      |         |  |
| Samples compared                     | Statistical test     | p-value |  |
| D21 V T21                            | Student's two tailed | 0.0000  |  |
| D21 V Q21                            | Student's two tailed | 0.0000  |  |
| <b>Figure S3: F</b>                  |                      |         |  |
| Samples compared                     | Statistical test     | p-value |  |
| D21 V D21 (NZ)                       | Student's two tailed | 0.3120  |  |
| T21 V T21 (NZ)                       | Student's two tailed | 0.5620  |  |
| Q21 V Q21 (NZ)                       | Student's two tailed | 0.0500  |  |
| <b>Figure S3: G (LEFT)</b>           |                      |         |  |
| Samples compared                     | Statistical test     | p-value |  |
| D21 V D21 (NZ)                       | Mann-Whitney U tes   | 0.8275  |  |
| T21 V T21 (NZ)                       | Mann-Whitney U tes   | 0.0000  |  |
| Q21 V Q21 (NZ)                       | Mann-Whitney U tes   | 0.0000  |  |
| <b>Figure S3: G (RIGHT)</b>          |                      |         |  |
| Samples compared                     | Statistical test     | p-value |  |
| D21 V D21 (NZ)                       | Student's two tailed | 0.6968  |  |
| T21 V T21 (NZ)                       | Student's two tailed | 0.0000  |  |
| Q21 V Q21 (NZ)                       | Student's two tailed | 0.0000  |  |
| <b>Figure S3: H (LEFT)</b>           |                      |         |  |
| Samples compared                     | Statistical test     | p-value |  |
| D21 V D21 (siPCNT)                   | Mann-Whitney U tes   | 0.0000  |  |
| T21 V T21 (siPCNT)                   | Mann-Whitney U tes   | 0.0000  |  |
| Q21 V Q21 (siPCNT)                   | Mann-Whitney U tes   | 0.0000  |  |
| <b>Figure S3: H (MIDDLE)</b>         |                      |         |  |
| Samples compared                     | Statistical test     | p-value |  |
| D21 V D21 (CD)                       | Mann-Whitney U tes   | 0.2000  |  |
| T21 V T21 (CD)                       | Mann-Whitney U tes   | 0.0000  |  |
| Q21 V Q21 (CD)                       | Mann-Whitney U tes   | 0.0000  |  |
| <b>Figure S3: H (RIGHT)</b>          |                      |         |  |
| Samples compared                     | Statistical test     | p-value |  |
| D21 V D21 (NZ)                       | Mann-Whitney U tes   | 0.0000  |  |
| T21 V T21 (NZ)                       | Mann-Whitney U tes   | 0.0000  |  |
| Q21 V Q21 (NZ)                       | Mann-Whitney U tes   | 0.0000  |  |
| <b>Figure S3: J (LEFT)</b>           |                      |         |  |
| Samples compared                     | Statistical test     | p-value |  |
| D21 (0 minute) V T21 (0 minute)      | Mann-Whitney U tes   | 0.1076  |  |
| D21 (0 minute) V Q21 (0 minute)      | Mann-Whitney U tes   | 0.0928  |  |
| <b>Figure S3: J (RIGHT)</b>          |                      |         |  |
| Samples compared                     | Statistical test     | p-value |  |
| D21 (0 minute) V T21 (0 minute)      | Mann-Whitney U tes   | 0.5927  |  |
| D21 (0 minute) V Q21 (0 minute)      | Mann-Whitney U tes   | 0.6095  |  |
| <b>Figure S3: K (TOP LEFT)</b>       |                      |         |  |
| Samples compared                     | Statistical test     | p-value |  |
| T21 V T21 24HR                       | Mann-Whitney U tes   | 0.0000  |  |
| Q21 V Q21 24HR                       | Mann-Whitney U tes   | 0.0000  |  |
| <b>Figure S3: K (TOP RIGHT)</b>      |                      |         |  |
| Samples compared                     | Statistical test     | p-value |  |
| T21 V T21 24HR                       | Mann-Whitney U tes   | 0.0000  |  |
| Q21 V Q21 24HR                       | Mann-Whitney U tes   | 0.0000  |  |
| <b>Figure S3: K (BOTTOM LEFT)</b>    |                      |         |  |
| Samples compared                     | Statistical test     | p-value |  |

|                                    |                      |         |  |
|------------------------------------|----------------------|---------|--|
| T21 V T21 24HR                     | Mann-Whitney U tes   | 0.0000  |  |
| Q21 V Q21 24HR                     | Mann-Whitney U tes   | 0.0000  |  |
| <b>Figure S3: K (BOTTOM RIGHT)</b> |                      |         |  |
| Samples compared                   | Statistical test     | p-value |  |
| T21 V T21 24HR                     | Mann-Whitney U tes   | 0.2678  |  |
| Q21 V Q21 24HR                     | Mann-Whitney U tes   | 0.3756  |  |
| <b>Figure 4: B</b>                 |                      |         |  |
| Samples compared                   | Statistical test     | p-value |  |
| D21 vs T21                         | Mann-Whitney U tes   | 0.0000  |  |
| D21 vs Q21                         | Mann-Whitney U tes   | 0.0000  |  |
| <b>Figure 4: C</b>                 |                      |         |  |
| Samples compared                   | Statistical test     | p-value |  |
| D21 V T21: A                       | Mann-Whitney U tes   | 0.1237  |  |
| D21 V T21: B                       | Mann-Whitney U tes   | 0.0143  |  |
| D21 V T21: C                       | Mann-Whitney U tes   | 0.0238  |  |
| D21 V T21: D                       | Mann-Whitney U tes   | 0.0850  |  |
| D21 V Q21: A                       | Mann-Whitney U tes   | 0.1040  |  |
| D21 V Q21: B                       | Mann-Whitney U tes   | 0.0067  |  |
| D21 V Q21: C                       | Mann-Whitney U tes   | 0.0037  |  |
| D21 V Q21: D                       | Mann-Whitney U tes   | 0.0006  |  |
| <b>Figure 4: E</b>                 |                      |         |  |
| Samples compared                   | Statistical test     | p-value |  |
| D21 V T21                          | Student's two tailed | 0.0101  |  |
| D21 V Q21                          | Student's two tailed | 0.0000  |  |
| <b>Figure 4: F</b>                 |                      |         |  |
| Samples compared                   | Statistical test     | p-value |  |
| D21 V D21 (siPCNT): A              | Mann-Whitney U tes   | 0.0268  |  |
| D21 V D21 (siPCNT): B              | Mann-Whitney U tes   | 0.0219  |  |
| D21 V D21 (siPCNT): C              | Mann-Whitney U tes   | 0.0082  |  |
| D21 V D21 (siPCNT): D              | Mann-Whitney U tes   | 0.0106  |  |
| T21 V T21 (siPCNT): A              | Mann-Whitney U tes   | 0.0060  |  |
| T21 V T21 (siPCNT): B              | Mann-Whitney U tes   | 0.0012  |  |
| T21 V T21 (siPCNT): C              | Mann-Whitney U tes   | 0.0038  |  |
| T21 V T21 (siPCNT): D              | Mann-Whitney U tes   | 0.0140  |  |
| Q21 V Q21 (siPCNT): A              | Mann-Whitney U tes   | 0.1040  |  |
| Q21 V Q21 (siPCNT): B              | Mann-Whitney U tes   | 0.0067  |  |
| Q21 V Q21 (siPCNT): C              | Mann-Whitney U tes   | 0.0037  |  |
| Q21 V Q21 (siPCNT): D              | Mann-Whitney U tes   | 0.0006  |  |
| <b>Figure 4: G (LEFT)</b>          |                      |         |  |
| Samples compared                   | Statistical test     | p-value |  |
| T21 V T21 (siPCNT)                 | Student's two tailed | 0.0000  |  |
| Q21 V Q21 (siPCNT)                 | Mann-Whitney U tes   | 0.0000  |  |
| <b>Figure 4: G (RIGHT)</b>         |                      |         |  |
| Samples compared                   | Statistical test     | p-value |  |
| T21 V T21 (siPCNT)                 | Student's two tailed | 0.0000  |  |
| Q21 V Q21 (siPCNT)                 | Mann-Whitney U tes   | 0.0000  |  |
| <b>Figure 4: I</b>                 |                      |         |  |
| Samples compared                   | Statistical test     | p-value |  |
| D21 V D21 (CD): A                  | Mann-Whitney U tes   | 0.1945  |  |
| D21 V D21 (CD): B                  | Mann-Whitney U tes   | 0.1618  |  |
| D21 V D21 (CD): C                  | Mann-Whitney U tes   | 0.2421  |  |
| D21 V D21 (CD): D                  | Mann-Whitney U tes   | 0.4131  |  |
| T21 V T21 (CD): A                  | Mann-Whitney U tes   | 0.4330  |  |
| T21 V T21 (CD): B                  | Mann-Whitney U tes   | 0.1390  |  |
| T21 V T21 (CD): C                  | Mann-Whitney U tes   | 0.1091  |  |
| T21 V T21 (CD): D                  | Mann-Whitney U tes   | 0.2874  |  |
| Q21 V Q21 (CD): A                  | Mann-Whitney U tes   | 0.1040  |  |
| Q21 V Q21 (CD): B                  | Mann-Whitney U tes   | 0.0067  |  |
| Q21 V Q21 (CD): C                  | Mann-Whitney U tes   | 0.0037  |  |
| Q21 V Q21 (CD): D                  | Mann-Whitney U tes   | 0.0006  |  |
| <b>Figure 4: J (LEFT)</b>          |                      |         |  |
| Samples compared                   | Statistical test     | p-value |  |
| T21 V T21 (CD)                     | Student's two tailed | 0.0000  |  |
| Q21 V Q21 (CD)                     | Mann-Whitney U tes   | 0.0000  |  |
| <b>Figure 4: J (RIGHT)</b>         |                      |         |  |
| Samples compared                   | Statistical test     | p-value |  |
| T21 V T21 (CD)                     | Student's two tailed | 0.0000  |  |
| Q21 V Q21 (CD)                     | Mann-Whitney U tes   | 0.0038  |  |
| <b>Figure 4: K</b>                 |                      |         |  |



| Samples compared                  | Statistical test     | p-value |  |
|-----------------------------------|----------------------|---------|--|
| D21 V D21 (NZ): A                 | Mann-Whitney U tes   | 0.9080  |  |
| D21 V D21 (NZ): B                 | Mann-Whitney U tes   | 0.9832  |  |
| D21 V D21 (NZ): C                 | Mann-Whitney U tes   | 0.6217  |  |
| D21 V D21 (NZ): D                 | Mann-Whitney U tes   | 0.6331  |  |
| T21 V T21 (NZ): A                 | Mann-Whitney U tes   | 0.5671  |  |
| T21 V T21 (NZ): B                 | Mann-Whitney U tes   | 0.4686  |  |
| T21 V T21 (NZ): C                 | Mann-Whitney U tes   | 0.5299  |  |
| T21 V T21 (NZ): D                 | Mann-Whitney U tes   | 0.4221  |  |
| Q21 V Q21 (NZ): A                 | Mann-Whitney U tes   | 0.4377  |  |
| Q21 V Q21 (NZ): B                 | Mann-Whitney U tes   | 0.4441  |  |
| Q21 V Q21 (NZ): C                 | Mann-Whitney U tes   | 0.5193  |  |
| Q21 V Q21 (NZ): D                 | Mann-Whitney U tes   | 0.5683  |  |
| <b>Figure 4: L (LEFT)</b>         |                      |         |  |
| Samples compared                  | Statistical test     | p-value |  |
| T21 V T21 (NZ)                    | Student's two tailed | 0.0000  |  |
| Q21 V Q21 (NZ)                    | Mann-Whitney U tes   | 0.0000  |  |
| <b>Figure 4: L (RIGHT)</b>        |                      |         |  |
| Samples compared                  | Statistical test     | p-value |  |
| T21 V T21 (NZ)                    | Student's two tailed | 0.0017  |  |
| Q21 V Q21 (NZ)                    | Student's two tailed | 0.9696  |  |
| <b>Figure S4: B</b>               |                      |         |  |
| Samples compared                  | Statistical test     | p-value |  |
| D21 V T21                         | Mann-Whitney U tes   | 0.0000  |  |
| D21 V Q21                         | Mann-Whitney U tes   | 0.0000  |  |
| <b>Figure S4: G (TOP LEFT)</b>    |                      |         |  |
| Samples compared                  | Statistical test     | p-value |  |
| D21 V T21                         | Mann-Whitney U tes   | 0.0000  |  |
| D21 V Q21                         | Mann-Whitney U tes   | 0.0000  |  |
| D21 CD V T21 CD                   | Mann-Whitney U tes   | 0.8545  |  |
| D21 CD V Q21 CD                   | Mann-Whitney U tes   | 0.0000  |  |
| D21 NZ V T21 NZ                   | Mann-Whitney U tes   | 0.0000  |  |
| D21 NZ V Q21 NZ                   | Mann-Whitney U tes   | 0.0000  |  |
| D21 V D21 CD                      | Mann-Whitney U tes   | 0.0000  |  |
| T21 V T21 CD                      | Mann-Whitney U tes   | 0.0000  |  |
| Q21 V Q21 CD                      | Mann-Whitney U tes   | 0.0644  |  |
| D21 V D21 NZ                      | Mann-Whitney U tes   | 0.1562  |  |
| T21 V T21 NZ                      | Mann-Whitney U tes   | 0.0144  |  |
| Q21 V Q21 NZ                      | Mann-Whitney U tes   | 0.0256  |  |
| <b>Figure S4: G (TOP MIDDLE)</b>  |                      |         |  |
| Samples compared                  | Statistical test     | p-value |  |
| D21 V T21                         | Mann-Whitney U tes   | 0.8632  |  |
| D21 V Q21                         | Mann-Whitney U tes   | 0.0000  |  |
| D21 CD V T21 CD                   | Mann-Whitney U tes   | 0.7899  |  |
| D21 CD V Q21 CD                   | Mann-Whitney U tes   | 0.0000  |  |
| D21 NZ V T21 NZ                   | Mann-Whitney U tes   | 0.0144  |  |
| D21 NZ V Q21 NZ                   | Mann-Whitney U tes   | 0.1240  |  |
| D21 V D21 CD                      | Mann-Whitney U tes   | 0.8342  |  |
| T21 V T21 CD                      | Mann-Whitney U tes   | 0.0000  |  |
| Q21 V Q21 CD                      | Mann-Whitney U tes   | 0.0000  |  |
| D21 V D21 NZ                      | Mann-Whitney U tes   | 0.0703  |  |
| T21 V T21 NZ                      | Mann-Whitney U tes   | 0.4872  |  |
| Q21 V Q21 NZ                      | Mann-Whitney U tes   | 0.0633  |  |
| <b>Figure S4: G (TOP RIGHT)</b>   |                      |         |  |
| Samples compared                  | Statistical test     | p-value |  |
| D21 V T21                         | Mann-Whitney U tes   | 0.2677  |  |
| D21 V Q21                         | Mann-Whitney U tes   | 0.9369  |  |
| D21 CD V T21 CD                   | Mann-Whitney U tes   | 0.6928  |  |
| D21 CD V Q21 CD                   | Mann-Whitney U tes   | 0.0565  |  |
| D21 NZ V T21 NZ                   | Mann-Whitney U tes   | 0.0019  |  |
| D21 NZ V Q21 NZ                   | Mann-Whitney U tes   | 0.0140  |  |
| D21 V D21 CD                      | Mann-Whitney U tes   | 0.0000  |  |
| T21 V T21 CD                      | Mann-Whitney U tes   | 0.0000  |  |
| Q21 V Q21 CD                      | Mann-Whitney U tes   | 0.0000  |  |
| D21 V D21 NZ                      | Mann-Whitney U tes   | 0.0009  |  |
| T21 V T21 NZ                      | Mann-Whitney U tes   | 0.0826  |  |
| Q21 V Q21 NZ                      | Mann-Whitney U tes   | 0.3573  |  |
| <b>Figure S4: G (BOTTOM LEFT)</b> |                      |         |  |
| Samples compared                  | Statistical test     | p-value |  |
| D21 V T21                         | Mann-Whitney U tes   | 0.0000  |  |
| D21 V Q21                         | Mann-Whitney U tes   | 0.0000  |  |
| D21 CD V T21 CD                   | Mann-Whitney U tes   | 0.0020  |  |
| D21 CD V Q21 CD                   | Mann-Whitney U tes   | 0.0162  |  |
| D21 NZ V T21 NZ                   | Mann-Whitney U tes   | 0.0000  |  |

|                 |                    |        |  |
|-----------------|--------------------|--------|--|
| D21 NZ V Q21 NZ | Mann-Whitney U tes | 0.0000 |  |
| D21 V D21 CD    | Mann-Whitney U tes | 0.8342 |  |
| T21 V T21 CD    | Mann-Whitney U tes | 0.0000 |  |
| Q21 V Q21 CD    | Mann-Whitney U tes | 0.0000 |  |
| D21 V D21 NZ    | Mann-Whitney U tes | 0.7072 |  |
| T21 V T21 NZ    | Mann-Whitney U tes | 0.1357 |  |
| Q21 V Q21 NZ    | Mann-Whitney U tes | 0.9361 |  |

**Figure S4: G (BOTTOM MIDDLE)**

| Samples compared | Statistical test   | p-value |  |
|------------------|--------------------|---------|--|
| D21 V T21        | Mann-Whitney U tes | 0.1400  |  |
| D21 V Q21        | Mann-Whitney U tes | 0.0000  |  |
| D21 CD V T21 CD  | Mann-Whitney U tes | 0.1394  |  |
| D21 CD V Q21 CD  | Mann-Whitney U tes | 0.0000  |  |
| D21 NZ V T21 NZ  | Mann-Whitney U tes | 0.0895  |  |
| D21 NZ V Q21 NZ  | Mann-Whitney U tes | 0.8859  |  |
| D21 V D21 CD     | Mann-Whitney U tes | 0.0138  |  |
| T21 V T21 CD     | Mann-Whitney U tes | 0.0162  |  |
| Q21 V Q21 CD     | Mann-Whitney U tes | 0.0000  |  |
| D21 V D21 NZ     | Mann-Whitney U tes | 0.0033  |  |
| T21 V T21 NZ     | Mann-Whitney U tes | 0.9198  |  |
| Q21 V Q21 NZ     | Mann-Whitney U tes | 0.0235  |  |

**Figure S4: G (BOTTOM RIGHT)**

| Samples compared | Statistical test   | p-value |  |
|------------------|--------------------|---------|--|
| D21 V T21        | Mann-Whitney U tes | 0.0000  |  |
| D21 V Q21        | Mann-Whitney U tes | 0.0000  |  |
| D21 CD V T21 CD  | Mann-Whitney U tes | 0.0000  |  |
| D21 CD V Q21 CD  | Mann-Whitney U tes | 0.0000  |  |
| D21 NZ V T21 NZ  | Mann-Whitney U tes | 0.0000  |  |
| D21 NZ V Q21 NZ  | Mann-Whitney U tes | 0.0000  |  |
| D21 V D21 CD     | Mann-Whitney U tes | 0.0000  |  |
| T21 V T21 CD     | Mann-Whitney U tes | 0.0000  |  |
| Q21 V Q21 CD     | Mann-Whitney U tes | 0.0000  |  |
| D21 V D21 NZ     | Mann-Whitney U tes | 0.0350  |  |
| T21 V T21 NZ     | Mann-Whitney U tes | 0.5878  |  |
| Q21 V Q21 NZ     | Mann-Whitney U tes | 0.0178  |  |
